# Supplementary material
Source: PubMed Central journal article supplement (PMC5827944)
Supplement: NIHMS943460-supplement-Supplementary_Materials.pdf [file NIHMS943460-supplement-Supplementary_Materials.pdf]

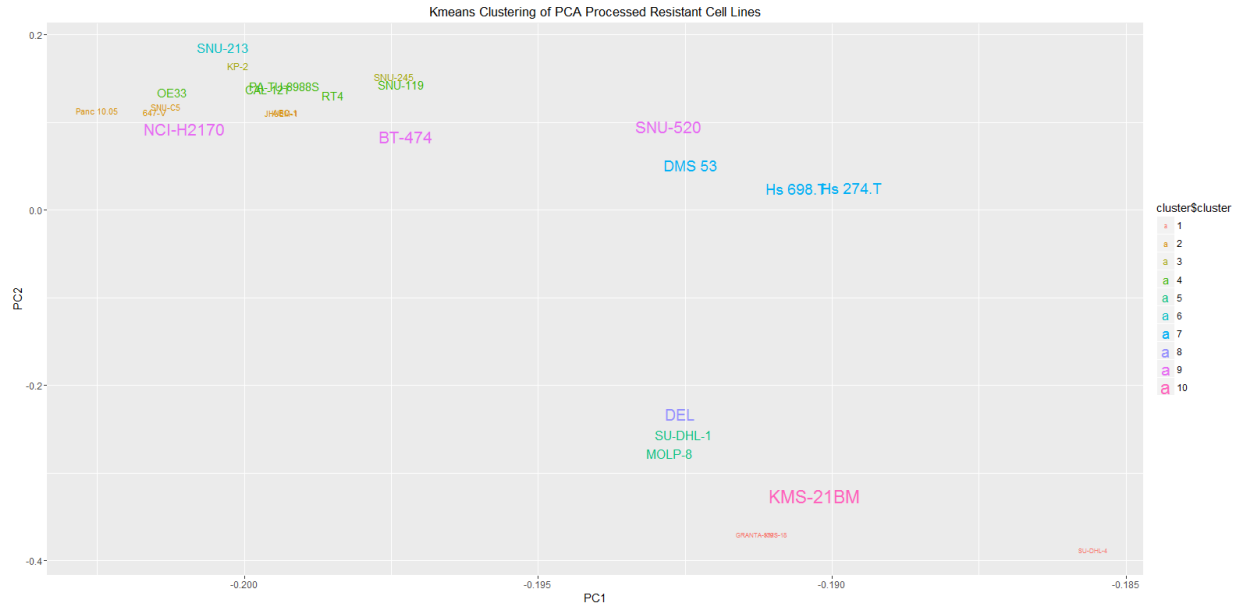

**Supplementary Figure 2A Transcriptome comparison of predicted statin resistant CCLE cell lines**

Principal component analysis was performed on the baseline gene expression profiles of 26 CCLE cell lines that are predicted to be statin resistant. K-means clustering was then applied to find 10 predominant clusters of the CCLE cell lines to establish a top 10 set of resistant cell lines.

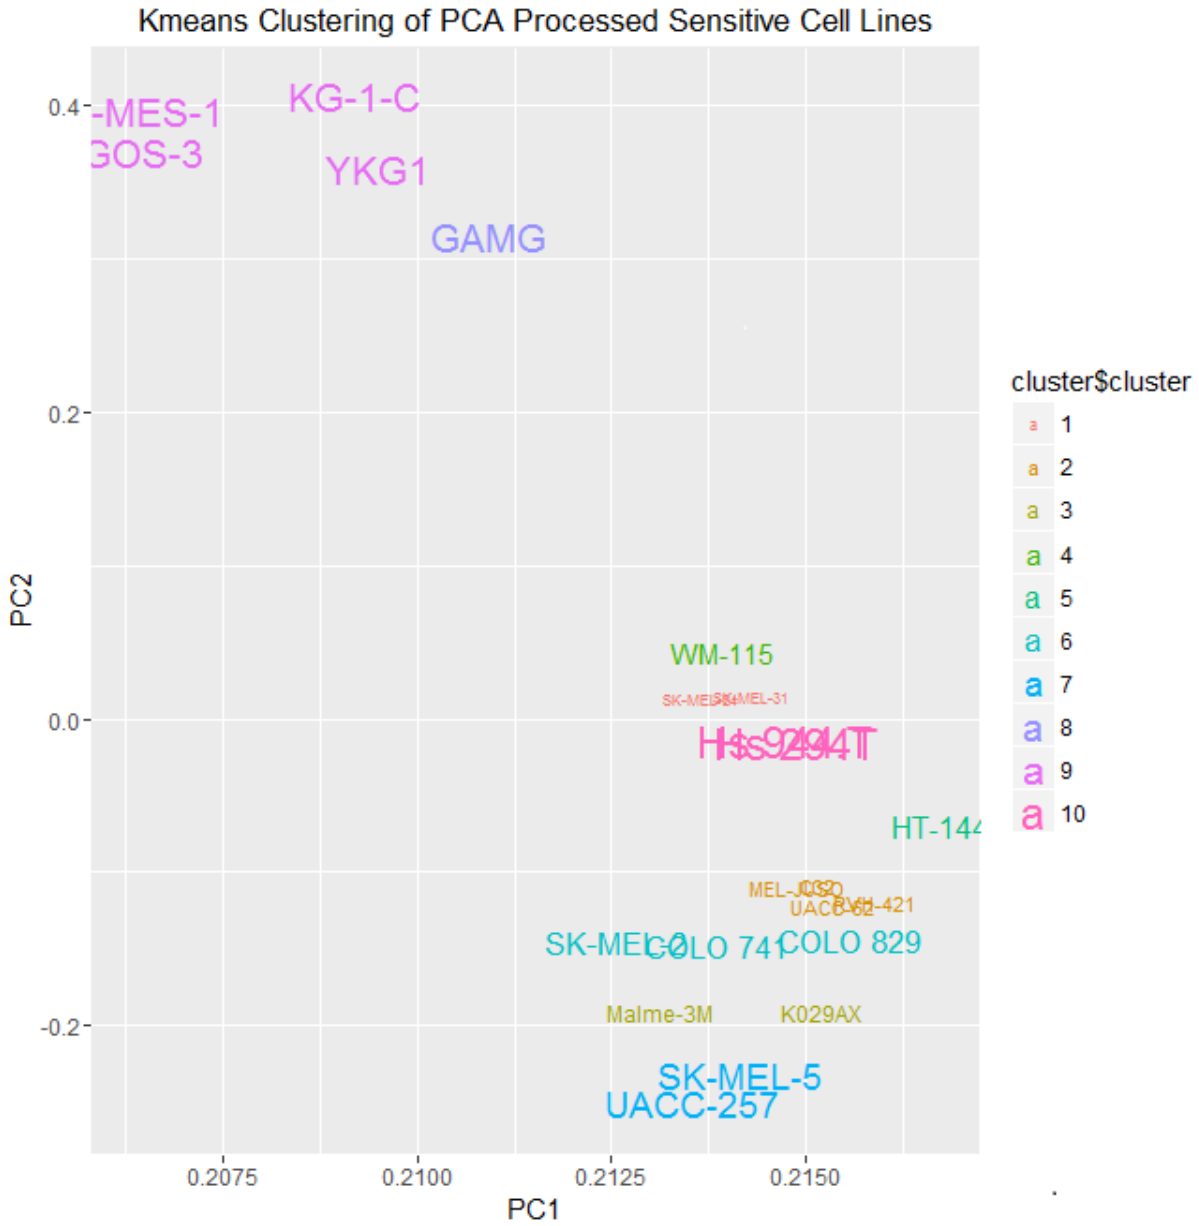

**Supplementary Figure 2B Transcriptome comparison of predicted statin sensitive CCLE cell lines**

Principal component analysis was performed on the baseline gene expression profiles of 23 CCLE cell lines that are predicted to be statin sensitive. K-means clustering was then applied to find 10 predominant clusters of the CCLE cell lines to establish a top 10 set of sensitive cell lines.

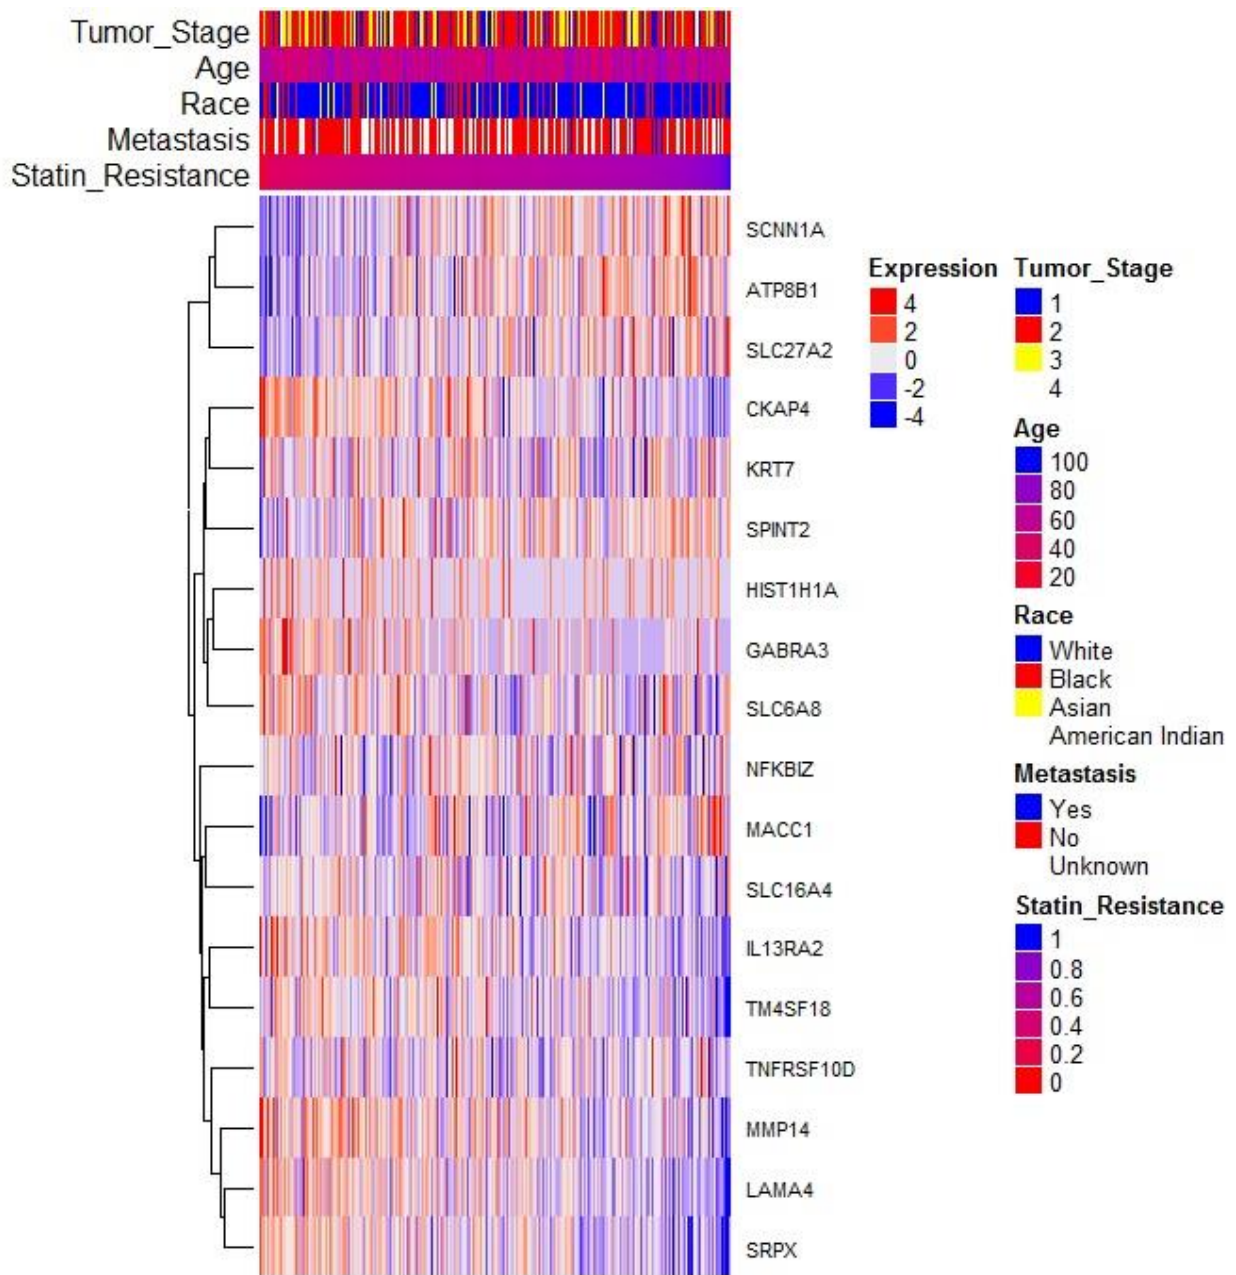

**Supplementary Figure 3A. Predicted statin sensitivity of breast cancers deposited in TCGA.**

Transcriptome profiles of breast cancer samples deposited in TCGA were used as input into our statin sensitivity predictive model. Clinical covariates showed no significant relationship with statin sensitivity.

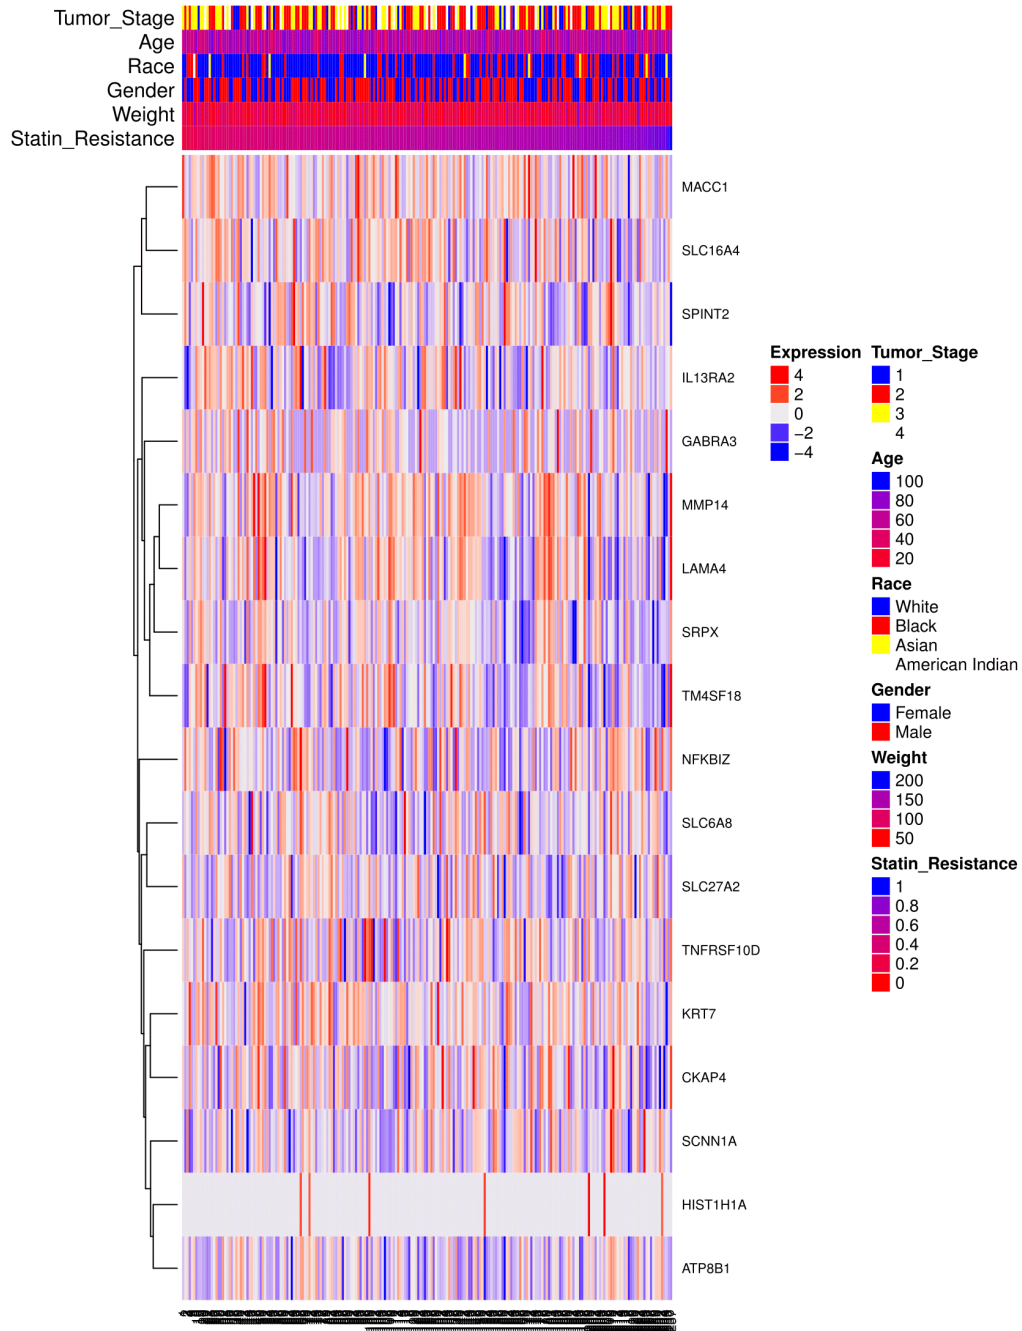

**Supplementary Figure3B COAD statin sensitivity predictions.** Predictions of statin sensitivity on the COAD (Colon Adenocarcinoma) TCGA expression data. Tumor metastasis was found to be significantly

correlated to statin sensitivity.

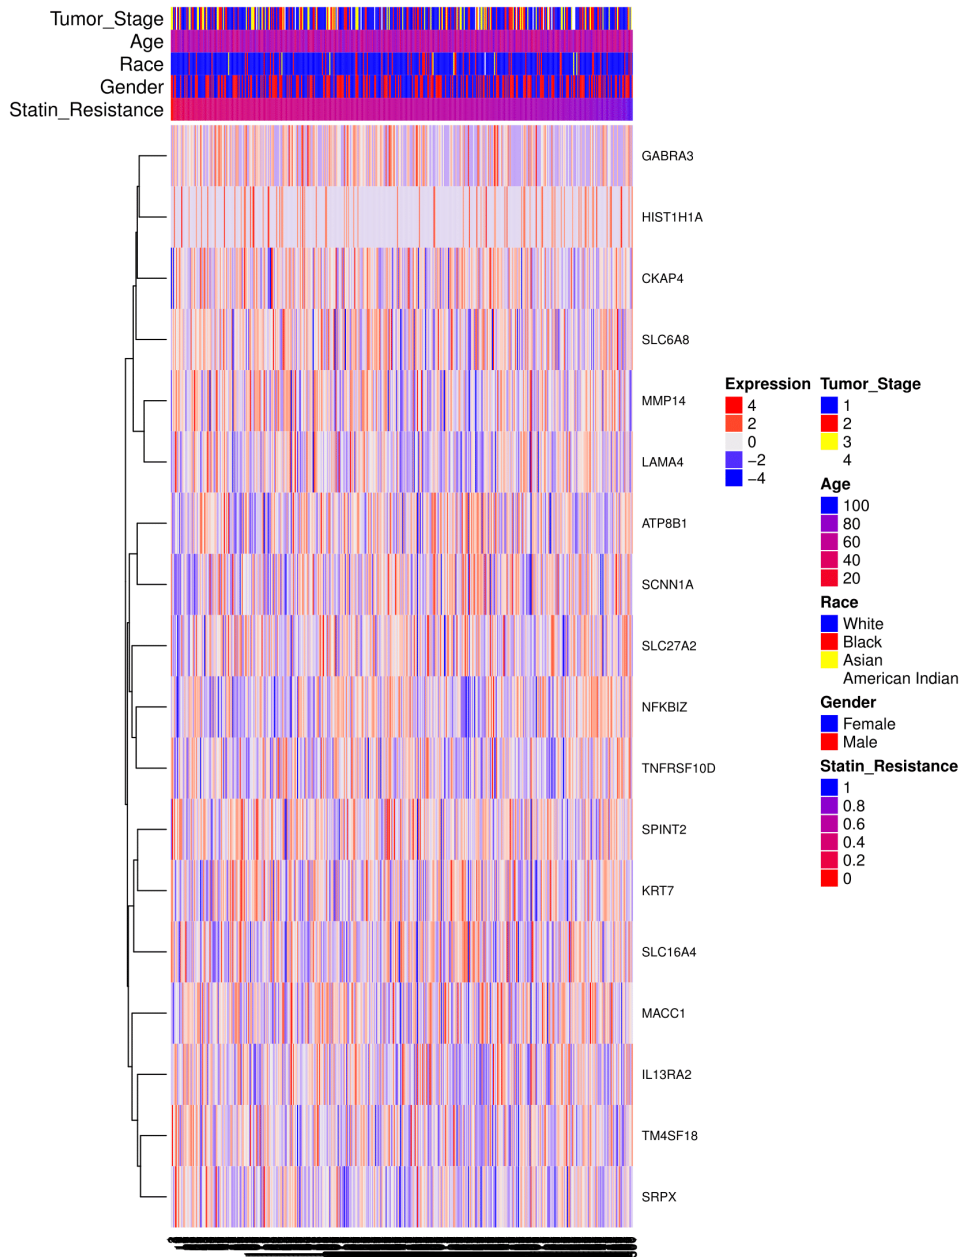

**Supplementary Figure 3C LUAD statin sensitivity predictions.** Predictions of statin sensitivity on the LUAD (Lung Adenocarcinoma) TCGA expression data. No covariates were found to be significantly correlated to statin sensitivity.



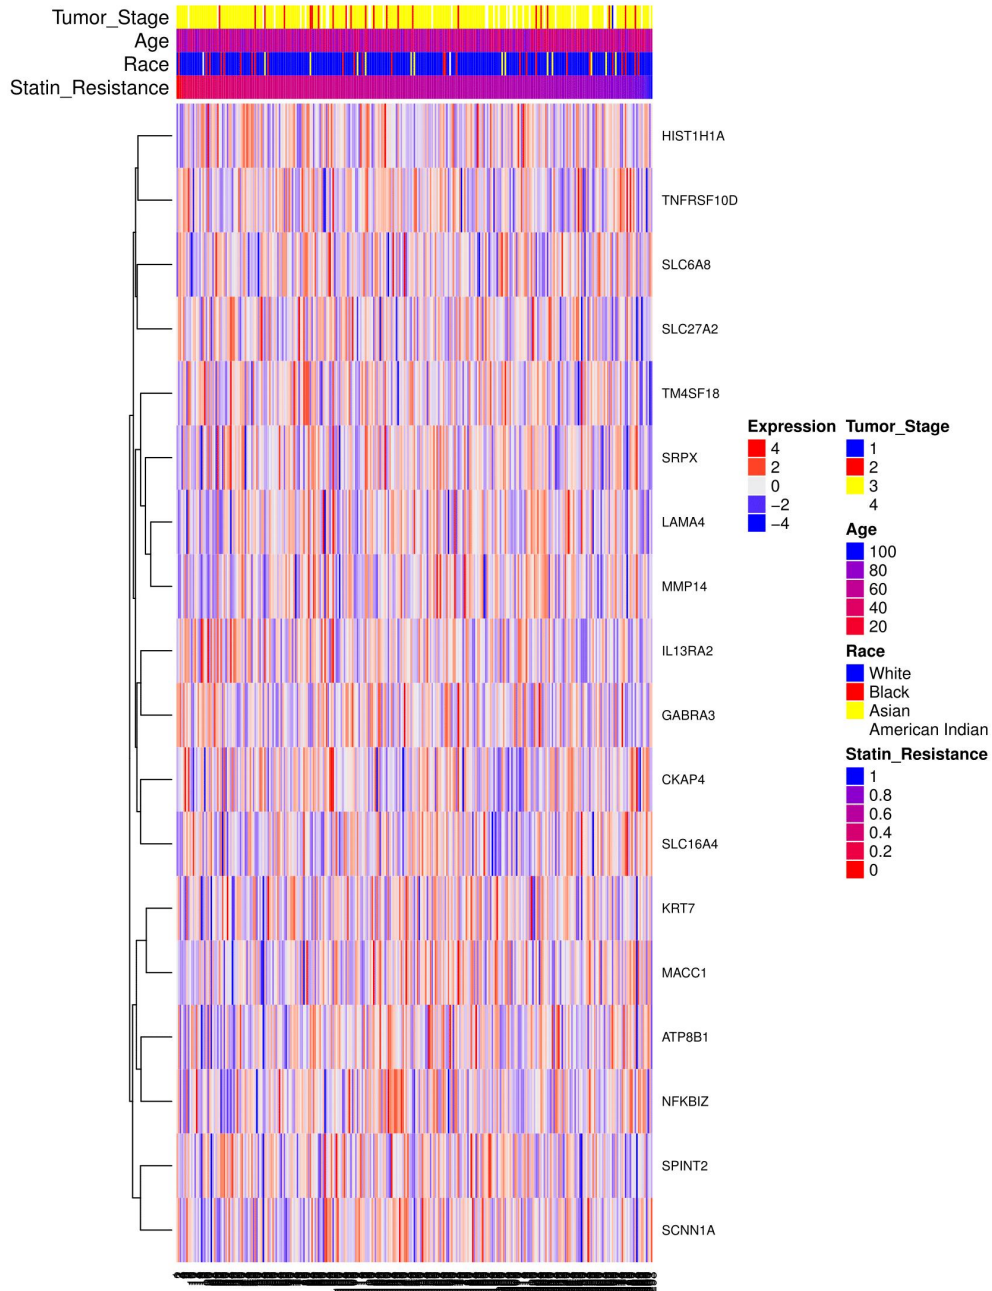

**Supplementary Figure 3D OV statin sensitivity predictions.** Predictions of statin sensitivity on the OV (Ovarian Cancer) TCGA expression data. Age was found to be significantly correlated to statin sensitivity.

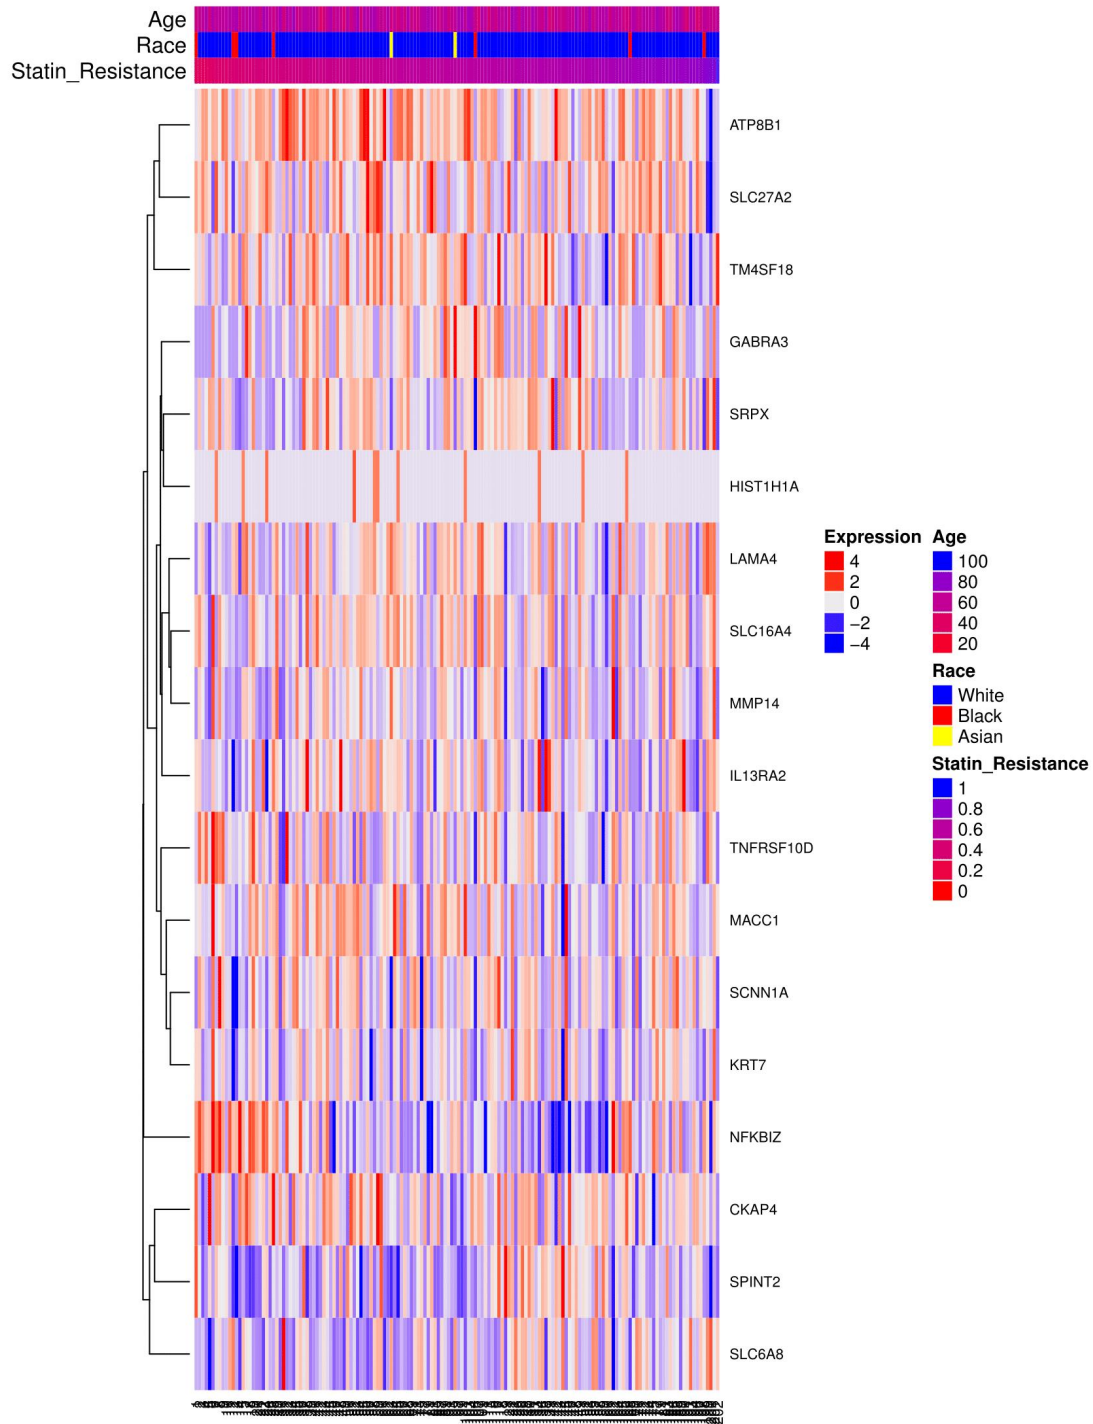

**Supplementary Figure 3E PRAD statin sensitivity predictions.** Predictions of statin sensitivity on the PRAD (Prostate Adenocarcinoma) TCGA expression data. No clinical covariates were found to be significantly correlated to statin sensitivity.

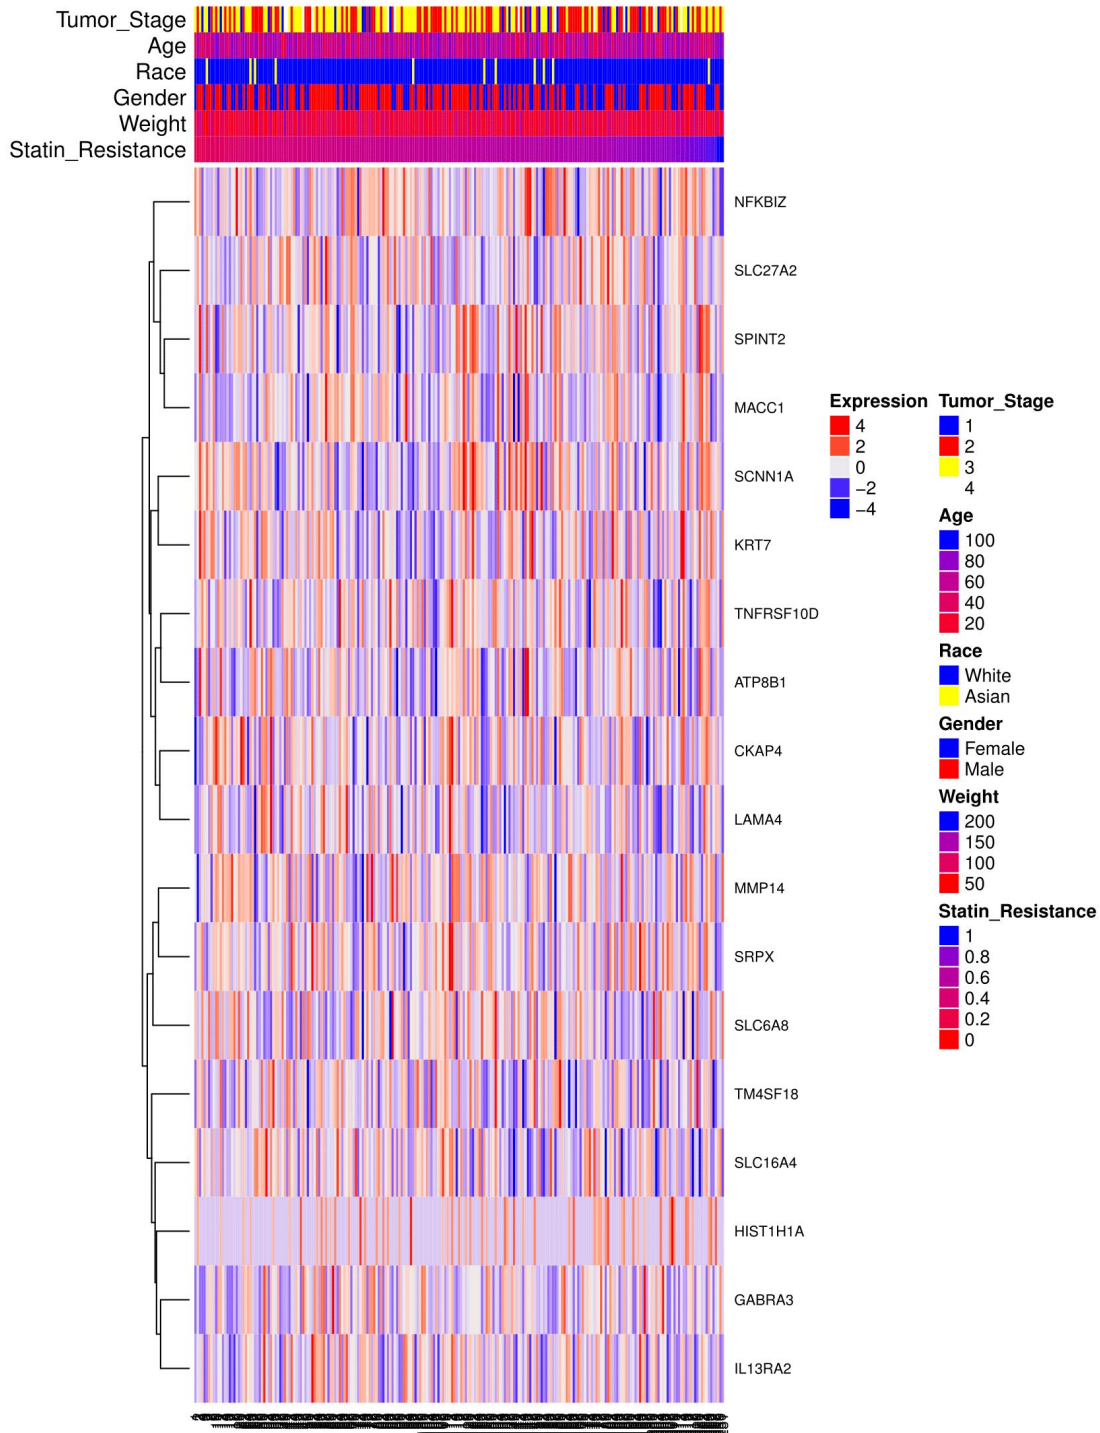

**Supplementary Figure 3F SKCM statin sensitivity predictions.** Predictions of statin sensitivity on the SKCM (Skin Cutaneous Melanoma) TCGA expression data. No clinical covariates were found to be significantly correlated to statin sensitivity.

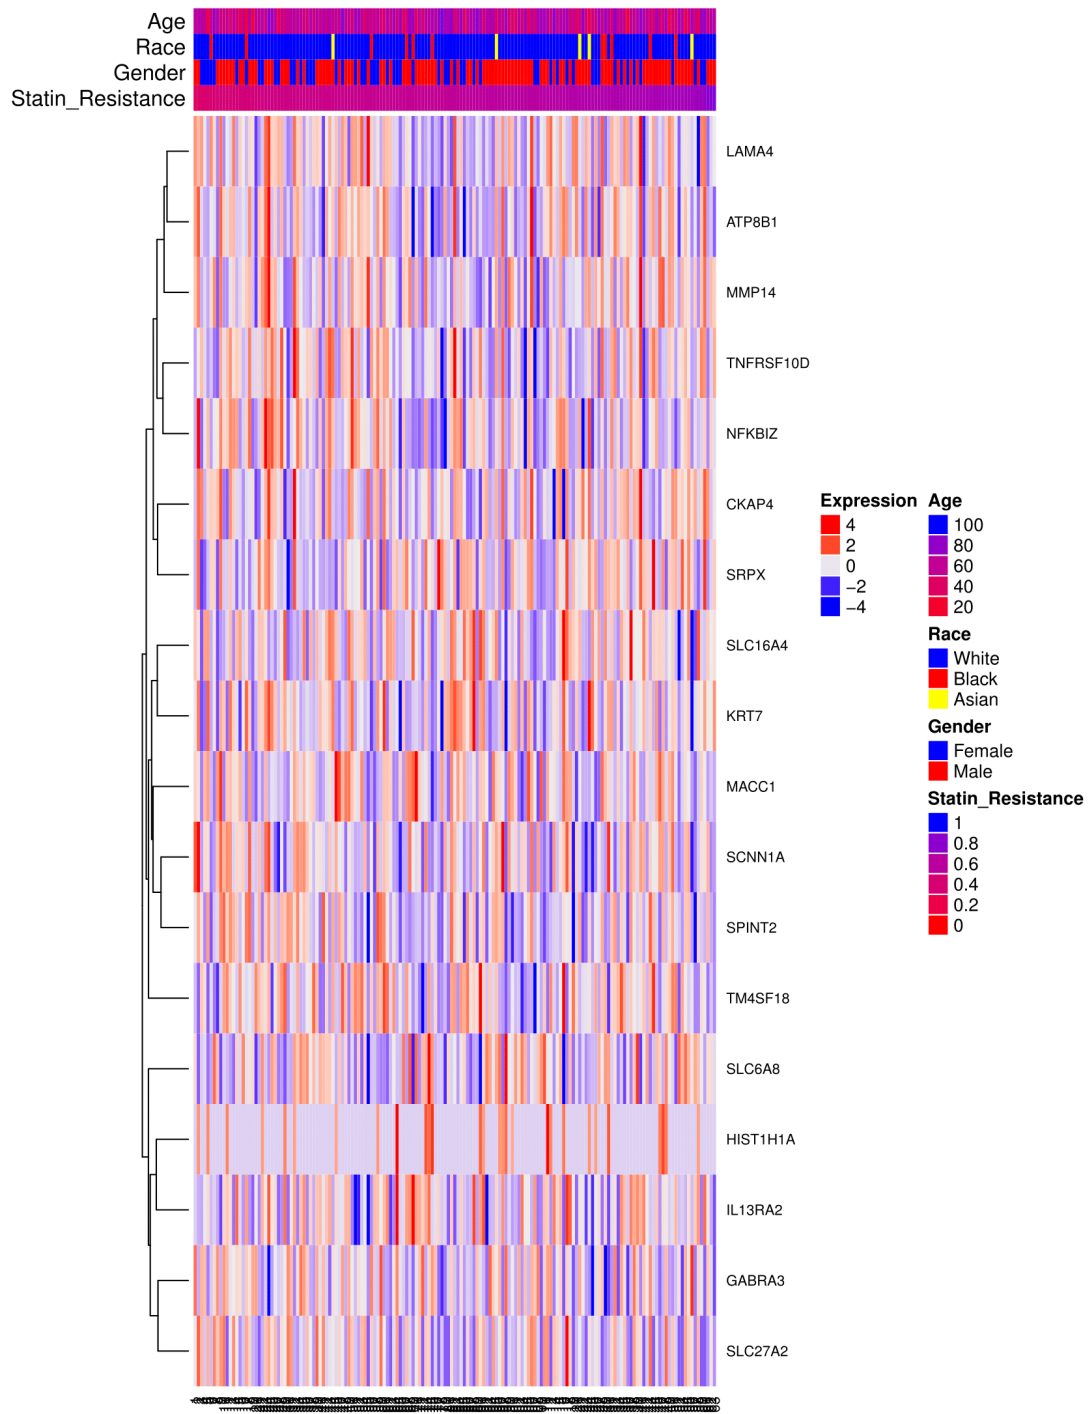

**Supplementary Figure 3G GBM statin sensitivity predictions.** Predictions of statin sensitivity on the GBM (Glioblastoma) TCGA expression data. No clinical covariates were found to be significantly correlated to statin sensitivity.

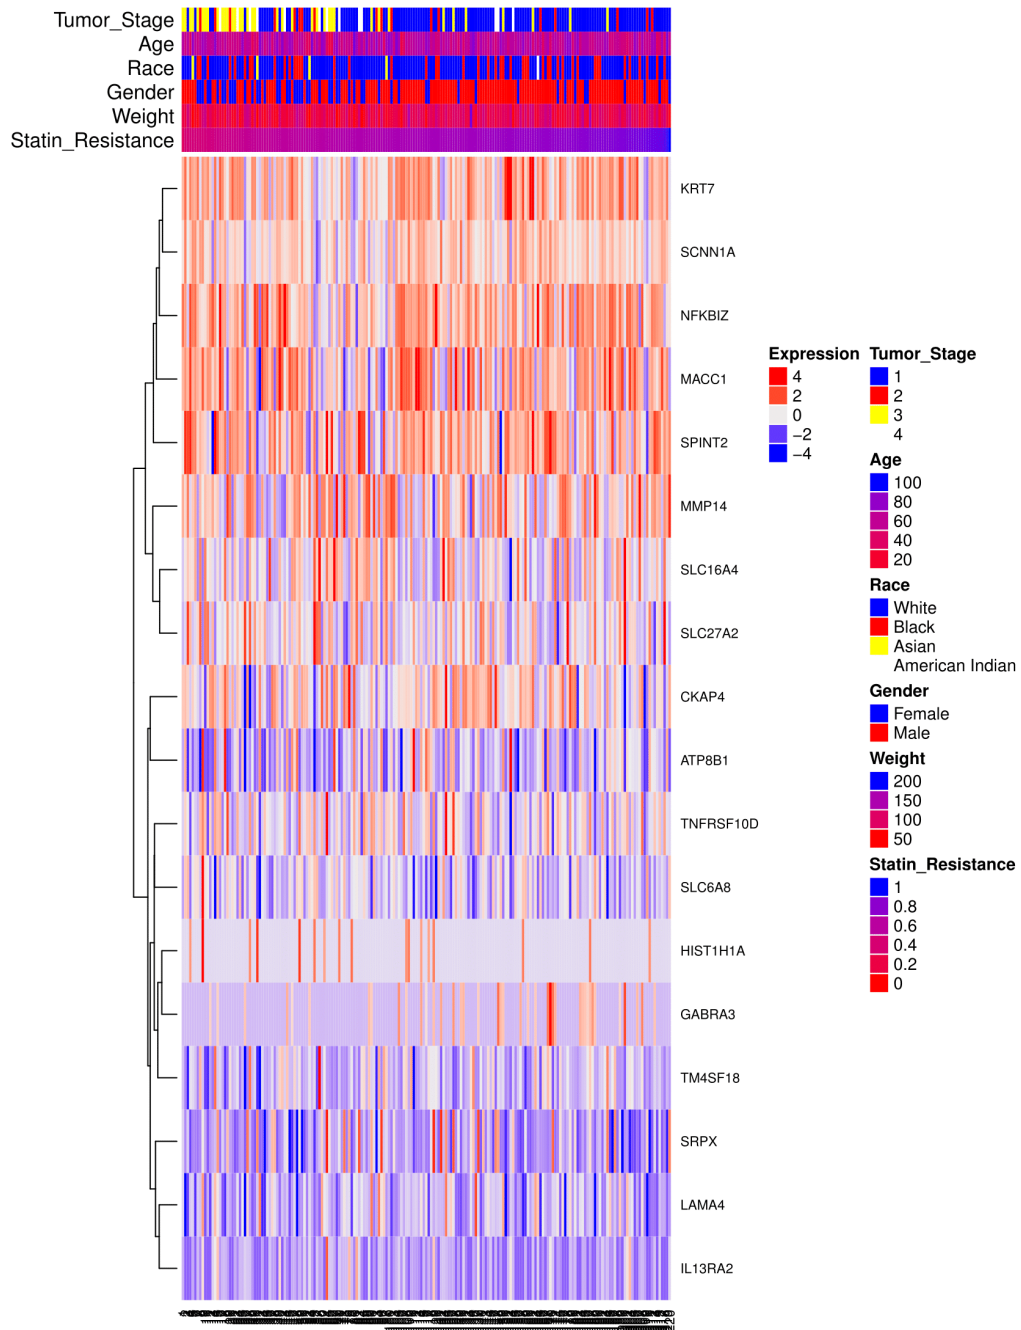

**Supplementary Figure 3H KIPAN statin sensitivity predictions.** Predictions of statin sensitivity on the KIPAN (Pan-Kidney Cohort) TCGA expression data. Age, Tumor Stage, and Weight were found to be significantly correlated to statin sensitivity.



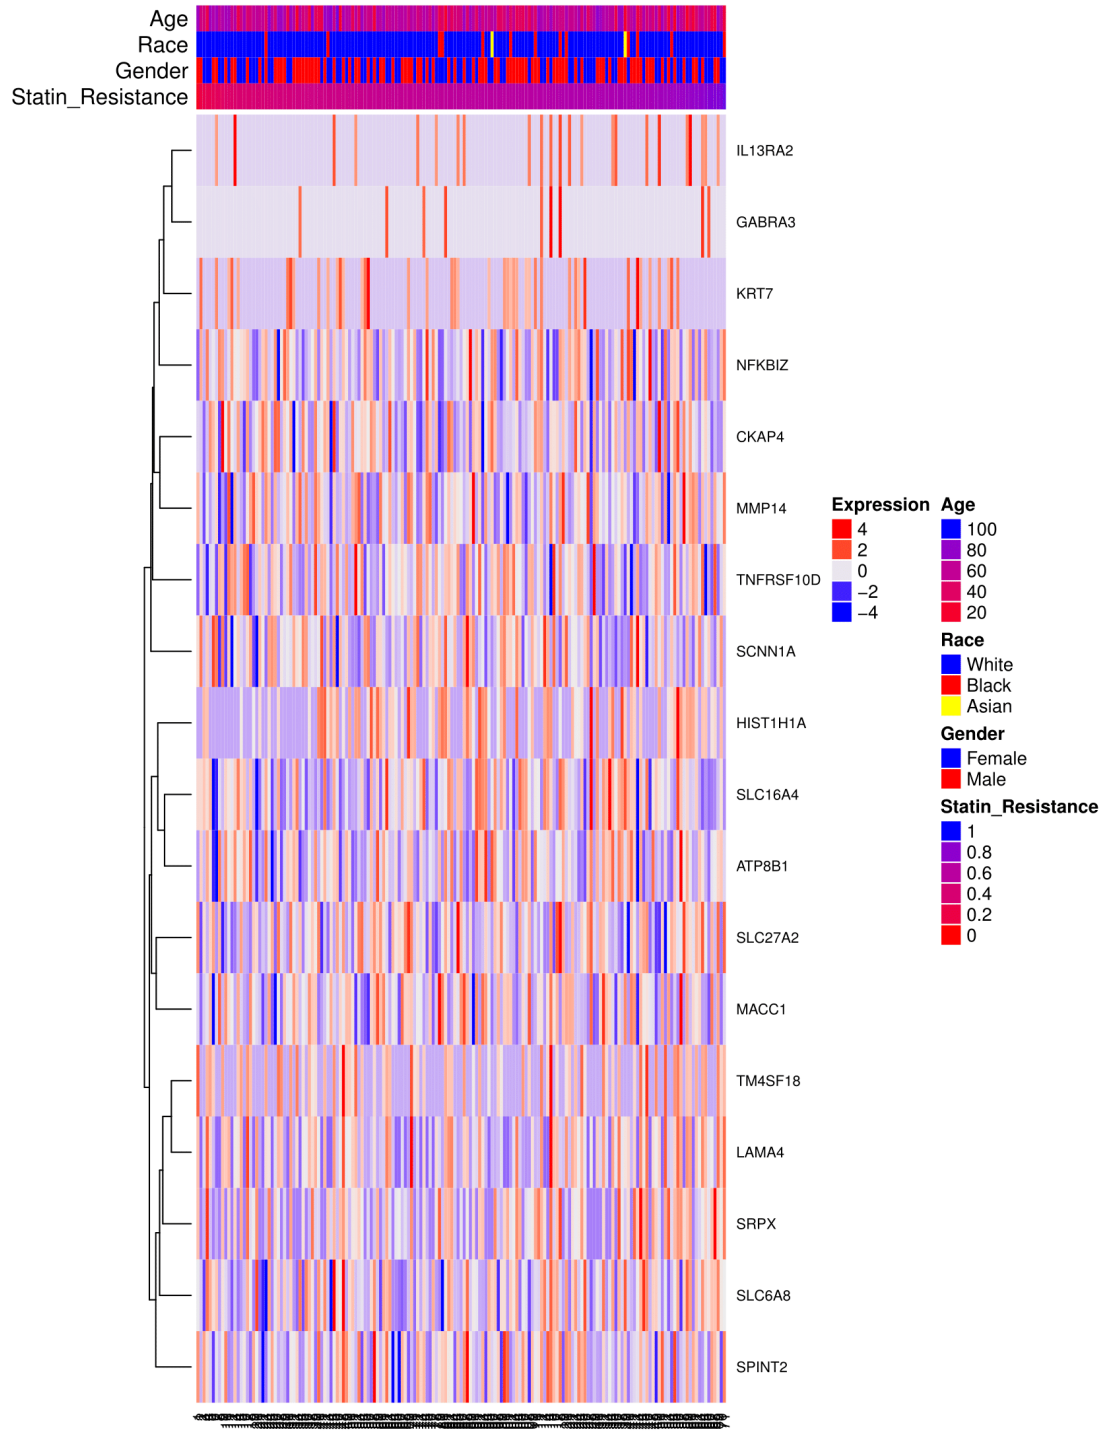

**Supplementary Figure 3I LAML statin sensitivity predictions.** Predictions of statin sensitivity on the LAML (Acute Myeloid Leukemia) TCGA expression data. Age was found to be significantly correlated to statin sensitivity.

| GO Term                           | Relevant Genes       | Corrected P-Value |
|-----------------------------------|----------------------|-------------------|
| Axonal transport of mitochondrion | UCHL1, NEFL          | 0.13939585        |
| Axon cytoplasm                    | UCHL1, NEFL          | 0.250536938       |
| Extracellular space               | CXCL5, CD70, IL13RA2 | 0.439228308       |
| Extracellular region              | CXCL5, MMP1, IL13RA2 | 0.45323271        |
| Myelin sheath                     | UCHL1, NEFL          | 0.466479946       |
| Rheumatoid arthritis              | CXCL5, MMP1          | 0.473252751       |
| Cell-cell signaling               | CXCL5, CD70          | 0.959289219       |

**Supplementary Table 1 Ontology of cluster one from identified signature:** Gene ontology terms from cluster one of genes from the Atorva-T-ReCS identified biological signature. P-Value correction for multiple testing was applied using the Bonferroni correction method.

| GO Term                                                 | Relevant Genes                 | Corrected P-Value |
|---------------------------------------------------------|--------------------------------|-------------------|
| Extracellular space                                     | CTSK, EREG, IL18, GAL, TNFAIP2 | 0.260167934       |
| Angiogenesis                                            | EREG, IL18, TNFAIP2            | 0.647369645       |
| SNARE binding                                           | VAMP8, TNFAIP2                 | 0.66437542        |
| Extracellular region                                    | CTSK, EREG, IL18, GAL          | 0.759814148       |
| Inflammatory response                                   | TNFRSF10D, IL18, GAL           | 0.764152784       |
| Rheumatoid arthritis                                    | CTSK, IL18                     | 0.801237029       |
| Positive regulation of smooth muscle cell proliferation | EREG, IL18                     | 0.814152797       |
| Legionellosis                                           | IL18, EEF1A2                   | 0.861642906       |

**Supplementary Table 2 Ontology of cluster two from identified signature:** Gene ontology terms from cluster two of genes from the Atorva-T-ReCS identified biological signature. P-Value correction for multiple testing was applied using the Bonferroni correction method.



| GO Term                                       | Relevant Genes                                                                          | Corrected P-Value |
|-----------------------------------------------|-----------------------------------------------------------------------------------------|-------------------|
| Cell adhesion                                 | LAMA4, LPXN, SRPX, TNC, POSTN, CDH2, ITGB3, THBS1, ENG, FN1, PCDH18, THY1               | 9.06E-08          |
| Focal adhesion                                | LPXN, TNC, HSPA1A, CDH2, ITGB3, ENG, PLAU, THY1                                         | 1.81E-04          |
| Extracellular matrix                          | LAMA4, SERPINE2, TNC, SERPINE1, POSTN, THBS1, FN1                                       | 2.46E-04          |
| Extracellular matrix organization             | LAMA4, TNC, SERPINE1, POSTN, ITGB3, THBS1, FN1                                          | 2.58E-04          |
| Extracellular space                           | SERPINE2, TNC, SERPINE1, CD109, AXL, POSTN, DPYSL3, THBS1, ENG, PLTP, PLAU, FN1         | 2.64E-04          |
| Cell surface                                  | SRPX, CD109, AXL, VAMP5, ITGB3, THBS1, ENG, PLAU, HLA-DRA                               | 2.71E-04          |
| Extracellular region                          | INHBA, LAMA4, CHRDL1, SERPINE2, GLIPR1, TNC, SERPINE1, HIST1H3C, THBS1, PLTP, PLAU, FN1 | 8.55E-04          |
| Regulation of cell migration                  | LAMA4, SERPINE2, DPYSL3, ITGB3, THY1                                                    | 0.00136393        |
| ECM-receptor interaction                      | LAMA4, TNC, ITGB3, THBS1, FN1                                                           | 0.002847294       |
| Negative regulation of plasminogen activation | SERPINE2, SERPINE1, THBS1                                                               | 0.003599381       |

**Supplementary Table 3 Ontology of cluster three from identified signature:** Gene ontology terms from cluster three of genes from the Atorva-T-ReCS identified biological signature. P-Value correction for multiple testing was applied using the Bonferroni correction method.

| <b>Tumor Type</b> | <b>COAD</b>     | <b>LUAD</b> | <b>OV</b>       | <b>PRAD</b> | <b>SKCM</b> | <b>GBM</b> | <b>KIPAN</b>    | <b>LAML</b>     |
|-------------------|-----------------|-------------|-----------------|-------------|-------------|------------|-----------------|-----------------|
| Metastasis        | <b>1.59E-02</b> | NA          | NA              | NA          | 2.55E-01    | NA         | NA              | NA              |
| Gender            | 7.13E-01        | 4.60E-01    | NA              | NA          | 2.39E-01    | 1.33E-01   | <b>5.23E-04</b> | 8.47E-01        |
| Age               | 9.51E-01        | 5.55E-02    | <b>6.62E-03</b> | 3.14E-01    | 2.87E-01    | 6.41E-01   | 9.93E-01        | <b>1.25E-02</b> |
| Tumor Stage       | 3.53E-01        | 6.61E-01    | 2.18E-01        | NA          | 6.79E-01    | NA         | <b>1.30E-11</b> | NA              |
| Weight            | 7.08E-01        | NA          | NA              | NA          | 9.54E-01    | NA         | <b>1.40E-02</b> | NA              |
| Race              | 6.51E-02        | 3.95E-01    | 5.15E-01        | 3.73E-01    | 5.44E-01    | 5.19E-01   | 2.36E-01        | 2.14E-01        |

**Supplementary Table 4 Correlations of clinical covariates with predicted statin sensitivity.**

Correlations represented as p-values with the null hypothesis of zero correlation. Statistically significant non-zero correlations at the .05 threshold are bolded. Columns refer to different tumor types from the TCGA, and rows refer to the particular clinical covariate.

| Cell_Line  | Atorva_TRECS | Combined     | Atorva_MGM   | Average      |
|------------|--------------|--------------|--------------|--------------|
| UACC-62    | -0.095187618 | -0.078630291 | -0.29537356  | -0.156397156 |
| SK-MEL-2   | -0.174954889 | -0.29596797  | -0.290684293 | -0.25386905  |
| Hs 944.T   | -0.066754828 | -0.299593724 | -0.279612918 | -0.21532049  |
| SK-MEL-24  | -0.436971908 | -0.252854899 | -0.271016817 | -0.320281208 |
| MEL-JUSO   | -0.00990986  | -0.059853918 | -0.247283339 | -0.105682372 |
| HT-144     | -0.14165462  | -0.135218854 | -0.235577555 | -0.17081701  |
| YKG1       | 0.026982043  | -0.554744169 | -0.216842825 | -0.24820165  |
| SK-MEL-5   | 0.022627577  | -0.099987534 | -0.212991538 | -0.096783832 |
| COLO 829   | -0.221409415 | 0.112235768  | -0.212423444 | -0.10719903  |
| UACC-257   | -0.12704164  | -0.108290579 | -0.200920061 | -0.145417427 |
| A-375      | -0.030142679 | -0.143974657 | -0.191396146 | -0.121837827 |
| Hs 936.T   | 0.072522085  | 0.056116996  | -0.154045524 | -0.008468814 |
| K029AX     | -0.16224047  | -0.171384531 | -0.131436226 | -0.155020409 |
| SNU-201    | 0.033576857  | -0.150756849 | -0.126382517 | -0.081187503 |
| U-251 MG   | 0.054975706  | -0.017881175 | -0.125564316 | -0.029489928 |
| SK-MEL-31  | -0.189181905 | 0.079321322  | -0.115899571 | -0.075253384 |
| RVH-421    | -0.189273117 | -0.121734169 | -0.115774761 | -0.142260683 |
| SNB-19     | 0.001513038  | -0.062588956 | -0.111499233 | -0.05752505  |
| KG-1-C     | 0.224584688  | -0.239376694 | -0.084750054 | -0.033180687 |
| H4         | 0.276203106  | 0.073991624  | -0.079664398 | 0.090176777  |
| KP-N-SI9s  | 0.131929563  | 0.103308055  | -0.070777485 | 0.054820044  |
| SNU-1105   | 0.326841213  | 0.085167406  | -0.070727659 | 0.11376032   |
| C32        | -0.163065606 | 0.056761213  | -0.070252655 | -0.05885235  |
| COLO 741   | -0.242386581 | -0.255876859 | -0.064776594 | -0.187680011 |
| COLO-783   | -0.034895507 | -0.115713981 | -0.058608781 | -0.069739423 |
| Hs 683     | 0.288959109  | 0.07226015   | -0.051902846 | 0.103105471  |
| LOX IMVI   | 0.288476543  | 0.387372566  | -0.049604263 | 0.208748282  |
| GOS-3      | -0.023521889 | -0.417776885 | -0.044031881 | -0.161776885 |
| SK-N-AS    | 0.376469835  | 0.264380327  | -0.038499445 | 0.200783572  |
| GCT        | 0.161856723  | -0.068986899 | -0.015770646 | 0.025699726  |
| Hs 939.T   | -0.008322876 | 0.350443375  | -0.014147429 | 0.109324357  |
| 1321N1     | 0.354244008  | 0.289195908  | -0.011499169 | 0.210646915  |
| IPC-298    | -0.148214832 | 0.043592736  | -0.007556455 | -0.03739285  |
| COLO-849   | -0.015912221 | 0.250225694  | -0.004486434 | 0.076609013  |
| SF-295     | 0.115274396  | 0.180740492  | -0.002583673 | 0.097810405  |
| MDA-MB-436 | 0.400143855  | 0.008135647  | 0.009015562  | 0.139098354  |
| RKN        | 0.25161838   | 0.386798182  | 0.011691016  | 0.216702526  |
| KMRC-1     | 0.040761949  | -0.109429144 | 0.011833984  | -0.018944404 |
| KNS-81     | 0.209055895  | -0.15185271  | 0.01598071   | 0.024394631  |
| KALS-1     | 0.396633204  | -0.159073876 | 0.016849903  | 0.084803077  |
| KNS-60     | 0.494516291  | 0.138370012  | 0.01894922   | 0.217278508  |
| A172       | 0.356922596  | 0.215032111  | 0.026124813  | 0.19935984   |
| Malme-3M   | -0.20386625  | 0.158152223  | 0.026986799  | -0.006242409 |
| A101D      | -0.098904093 | 0.304914249  | 0.028955078  | 0.078321744  |
| CAS-1      | 0.19198202   | 0.644338378  | 0.029239637  | 0.288520011  |
| DK-MG      | 0.521071069  | 0.378153182  | 0.038672685  | 0.312632312  |

|                    |              |              |             |              |
|--------------------|--------------|--------------|-------------|--------------|
| <b>GAMG</b>        | 0.201622434  | -0.377772726 | 0.042138391 | -0.044670634 |
| <b>COLO-800</b>    | -0.111449905 | 0.219737477  | 0.042483222 | 0.050256931  |
| <b>HuH28</b>       | 0.192526094  | -0.030939612 | 0.047740969 | 0.069775817  |
| <b>NMC-G1</b>      | 0.411829529  | -0.002827932 | 0.04793942  | 0.152313672  |
| <b>WM-793</b>      | 0.051260376  | 0.014739309  | 0.048129256 | 0.03804298   |
| <b>U-87 MG</b>     | 0.216003827  | 0.415345185  | 0.053367346 | 0.228238786  |
| <b>Daoy</b>        | 0.257198928  | 0.129535958  | 0.057024574 | 0.14791982   |
| <b>COLO-679</b>    | -0.014030322 | 0.358450816  | 0.058275881 | 0.134232125  |
| <b>COLO-818</b>    | -0.103031667 | 0.067961916  | 0.05829518  | 0.00774181   |
| <b>RPMI-7951</b>   | 0.488588228  | 0.200259007  | 0.066124833 | 0.251657356  |
| <b>AM-38</b>       | 0.35638653   | 0.372118315  | 0.071013815 | 0.26650622   |
| <b>SK-MEL-28</b>   | 0.080113182  | 0.345351142  | 0.072436875 | 0.165967066  |
| <b>SH-4</b>        | 0.054342064  | 0.108037424  | 0.076183363 | 0.07952095   |
| <b>Hs 294T</b>     | -0.233853801 | 0.329266716  | 0.089262882 | 0.061558599  |
| <b>WM-88</b>       | -0.097309623 | 0.319080331  | 0.104648646 | 0.108806451  |
| <b>YH-13</b>       | 0.451710121  | 0.13813274   | 0.105511339 | 0.231784734  |
| <b>SK-MEL-3</b>    | 0.036016185  | 0.313705532  | 0.108113831 | 0.152611849  |
| <b>WM1799</b>      | 0.005935186  | -0.035153193 | 0.110966773 | 0.027249589  |
| <b>WM-266-4</b>    | -0.123160449 | 0.38158636   | 0.115034015 | 0.124486642  |
| <b>SW 1353</b>     | 0.382551142  | 0.131035875  | 0.116327295 | 0.209971438  |
| <b>Hs 695T</b>     | -0.110754368 | 0.170739611  | 0.116614862 | 0.058866701  |
| <b>MDA-MB-435S</b> | 0.050213151  | 0.018911844  | 0.118114123 | 0.062413039  |
| <b>FTC-133</b>     | 0.372809935  | 0.059584763  | 0.126745614 | 0.186380104  |
| <b>IGR-1</b>       | 0.197624223  | 0.264778538  | 0.130234796 | 0.197545852  |
| <b>TM-31</b>       | 0.545699346  | 0.150763051  | 0.133004241 | 0.276488879  |
| <b>NCI-H1792</b>   | 0.435043481  | -0.049400159 | 0.134738201 | 0.173460507  |
| <b>HD-MY-Z</b>     | 0.404059931  | 0.358342134  | 0.136995884 | 0.299799316  |
| <b>SNU-387</b>     | 0.468047939  | 0.264303172  | 0.138482848 | 0.290277986  |
| <b>DBTRG-05MG</b>  | 0.3386855    | 0.582466364  | 0.147707804 | 0.356286556  |
| <b>GMS-10</b>      | 0.275700189  | 0.109248001  | 0.148147013 | 0.177698401  |
| <b>SNU-626</b>     | 0.265274417  | 0.063003076  | 0.149844473 | 0.159373989  |
| <b>SK-MES-1</b>    | 0.155692509  | -0.480376647 | 0.152314153 | -0.057456662 |
| <b>GCIY</b>        | -0.013350652 | 0.237909587  | 0.15266228  | 0.125740405  |
| <b>MeWo</b>        | 0.214229618  | 0.417979455  | 0.155651637 | 0.262620237  |
| <b>U-138 MG</b>    | 0.496775126  | 0.359641593  | 0.15729371  | 0.337903476  |
| <b>NCI-H1299</b>   | 0.253457443  | 0.427151397  | 0.16209573  | 0.280901523  |
| <b>SK-MEL-30</b>   | 0.207979302  | 0.456392335  | 0.163816385 | 0.276062674  |
| <b>G-361</b>       | 0.273713946  | 0.423528998  | 0.166468954 | 0.287903966  |
| <b>KNS-42</b>      | 0.15326689   | 0.07407735   | 0.16732942  | 0.131557887  |
| <b>MDST8</b>       | 0.366491481  | 0.360344668  | 0.16938863  | 0.298741593  |
| <b>GI-1</b>        | 0.354442072  | 0.176050002  | 0.174431504 | 0.234974526  |
| <b>SK-LMS-1</b>    | 0.362656612  | 0.768204723  | 0.176765192 | 0.435875509  |
| <b>SW 1783</b>     | 0.431889011  | 0.271398593  | 0.180961829 | 0.294749811  |
| <b>Becker</b>      | 0.077261356  | 0.303386661  | 0.182863739 | 0.187837252  |
| <b>COLO-699</b>    | 0.012466158  | -0.005464352 | 0.184120403 | 0.063707403  |
| <b>MHH-NB-11</b>   | 0.539066952  | 0.487044778  | 0.185459656 | 0.403857129  |
| <b>SW 1088</b>     | 0.335728293  | 0.374817646  | 0.195391986 | 0.301979308  |

|            |              |              |             |             |
|------------|--------------|--------------|-------------|-------------|
| MEL-HO     | 0.054964505  | 0.343415068  | 0.198002377 | 0.198793984 |
| IGR-37     | 0.343672954  | 0.311265466  | 0.198163486 | 0.284367302 |
| RD         | 0.021952203  | 0.361302775  | 0.200794851 | 0.194683276 |
| Hs 742.T   | 0.365989003  | 0.77038711   | 0.205430736 | 0.44726895  |
| IGR-39     | 0.638161646  | 0.267732697  | 0.209383122 | 0.371759155 |
| NCI-H460   | 0.333198916  | 0.175366399  | 0.211348539 | 0.239971285 |
| Hs 706.T   | 0.214282397  | 0.350291461  | 0.213023113 | 0.259198991 |
| SNU-466    | 0.2674747    | 0.557624534  | 0.213320997 | 0.346140077 |
| WM-983B    | 0.235112384  | 0.541924691  | 0.221145965 | 0.33272768  |
| LU99       | 0.387759968  | 0.331296155  | 0.224483408 | 0.314513177 |
| CCF-STTG1  | 0.295842395  | 0.212030507  | 0.225279102 | 0.244384002 |
| COLO 792   | 0.246466167  | 0.641209581  | 0.226676197 | 0.371450648 |
| SK-N-BE(2) | 0.474913766  | 0.596347102  | 0.233703489 | 0.434988119 |
| NCI-H1339  | 0.087531994  | 0.38390299   | 0.234297148 | 0.235244044 |
| SNU-878    | 0.6805759    | 0.216313554  | 0.241330486 | 0.379406647 |
| 143B       | 0.454179987  | 0.120897842  | 0.242955351 | 0.272677727 |
| Hs 852.T   | 0.366436905  | 0.554856064  | 0.243037857 | 0.388110275 |
| huH-1      | 0.379425427  | -0.110204775 | 0.24310761  | 0.170776087 |
| LN-229     | 0.187205834  | 0.432862287  | 0.246239179 | 0.2887691   |
| RKO        | 0.338055215  | 0.609699406  | 0.247583187 | 0.398445936 |
| CHL-1      | 0.205763782  | 0.314117043  | 0.2500614   | 0.256647408 |
| NCI-H1651  | 0.160812171  | 0.152447613  | 0.250392714 | 0.187884166 |
| WM-115     | -0.175412577 | 0.497663333  | 0.250609108 | 0.190953288 |
| Hs 766T    | 0.247044474  | 0.145050979  | 0.253269354 | 0.215121602 |
| NH-6       | 0.453629694  | 0.50216086   | 0.255587005 | 0.403792519 |
| Hs 675.T   | 0.33607949   | 0.743410265  | 0.255813576 | 0.44510111  |
| LMSU       | 0.272115599  | 0.735710796  | 0.256534654 | 0.421453683 |
| MSTO-211H  | 0.425055725  | 0.580681369  | 0.256836622 | 0.420857905 |
| JHH-2      | 0.215382389  | 0.340550899  | 0.256931947 | 0.270955078 |
| B-CPAP     | 0.326094792  | 0.563634724  | 0.260150249 | 0.383293255 |
| U-2 OS     | 0.2347249    | 0.233736635  | 0.261746643 | 0.243402726 |
| SK-MEL-1   | 0.318348063  | 0.399310811  | 0.261826957 | 0.326495277 |
| MPP 89     | 0.538320398  | 0.585438443  | 0.26480093  | 0.462853257 |
| UM-UC-3    | 0.624529471  | 0.643830598  | 0.266709822 | 0.511689964 |
| HLE        | 0.479045982  | 0.228193967  | 0.270406848 | 0.325882266 |
| Hs 746T    | 0.469361275  | 0.857096006  | 0.270537949 | 0.532331743 |
| HT-1080    | 0.415609811  | 0.231131923  | 0.271687769 | 0.306143168 |
| SK-UT-1    | 0.551300778  | 0.389668838  | 0.272285314 | 0.40441831  |
| Hs 618.T   | 0.476053964  | 0.894425336  | 0.273030545 | 0.547836615 |
| NCI-H650   | -0.046363345 | 0.272580086  | 0.275009404 | 0.167075382 |
| ES-2       | 0.209812514  | 0.422278719  | 0.275148356 | 0.302413196 |
| TUHR14TKB  | 0.40697594   | -0.044063931 | 0.278254455 | 0.213722155 |
| ESS-1      | 0.439211239  | 0.254160748  | 0.280221037 | 0.324531008 |
| SNU-46     | 0.477962013  | 0.407456331  | 0.282580996 | 0.389333113 |
| RERF-LC-MS | 0.474042152  | 0.277680092  | 0.28982983  | 0.347184025 |
| SF126      | 0.456132005  | 0.438167317  | 0.290111199 | 0.394803507 |
| SH-10-TC   | 0.390726887  | 0.498518143  | 0.295866341 | 0.395037124 |

|                            |             |              |             |             |
|----------------------------|-------------|--------------|-------------|-------------|
| <b>8-MG-BA</b>             | 0.20645091  | 0.501376561  | 0.297697877 | 0.335175116 |
| <b>S-117</b>               | 0.56221501  | 0.246110171  | 0.302665864 | 0.370330349 |
| <b>BT-549</b>              | 0.59399652  | 0.030186724  | 0.30296985  | 0.309051031 |
| <b>SK-N-SH</b>             | 0.523600622 | 0.552692362  | 0.303074585 | 0.45978919  |
| <b>SK-N-FI</b>             | 0.391203411 | 0.543953347  | 0.305976859 | 0.413711206 |
| <b>SCC-25</b>              | 0.615111537 | 0.251382667  | 0.31727254  | 0.394588914 |
| <b>KS-1</b>                | 0.521181576 | 0.750055343  | 0.319001328 | 0.530079415 |
| <b>EN</b>                  | 0.016845973 | -0.099105712 | 0.319721175 | 0.079153812 |
| <b>Hs 839.T</b>            | 0.57711234  | 0.591084884  | 0.320851448 | 0.496349557 |
| <b>MG-63</b>               | 0.639835309 | 0.170153869  | 0.324316478 | 0.378101885 |
| <b>HMCB</b>                | 0.165603965 | 0.295631352  | 0.324721522 | 0.261985613 |
| <b>Hs 606.T</b>            | 0.441665208 | 0.78511341   | 0.32644527  | 0.517741296 |
| <b>Hs 343.T</b>            | 0.539620839 | 0.717138529  | 0.328663779 | 0.528474382 |
| <b>HLF-a</b>               | 0.445604578 | 0.995924077  | 0.328975611 | 0.590168089 |
| <b>Hs 840.T</b>            | 0.481895507 | 0.969861275  | 0.335157214 | 0.595637998 |
| <b>JHH-4</b>               | 0.155845012 | 0.307710909  | 0.335889454 | 0.266481792 |
| <b>CHP-212</b>             | 0.406391183 | 0.662436969  | 0.3372427   | 0.468690284 |
| <b>HGC-27</b>              | 0.338872635 | 0.462703942  | 0.337523295 | 0.379699957 |
| <b>JHOM-1</b>              | 0.326222066 | 0.490419338  | 0.337601695 | 0.3847477   |
| <b>Hey-A8</b>              | 0.696035579 | 0.639909806  | 0.339192229 | 0.558379205 |
| <b>NCI-H196</b>            | 0.291605362 | 0.585503255  | 0.342479808 | 0.406529475 |
| <b>A-498</b>               | 0.339117528 | 0.084697598  | 0.342563482 | 0.255459536 |
| <b>T98G</b>                | 0.25825758  | 0.544258517  | 0.343688218 | 0.382068105 |
| <b>ML-1</b>                | 0.22318703  | 0.160291143  | 0.348234472 | 0.243904215 |
| <b>Hs 888.T</b>            | 0.33900489  | 0.969877553  | 0.350021205 | 0.552967883 |
| <b>Hs 822.T</b>            | 0.608734218 | 0.672822477  | 0.351749374 | 0.544435357 |
| <b>ONS-76</b>              | 0.503125304 | 0.358686565  | 0.352729275 | 0.404847048 |
| <b>JMSU-1</b>              | 0.59476091  | 0.755302946  | 0.352767707 | 0.567610521 |
| <b>LCLC-103H</b>           | 0.723219655 | 0.278054531  | 0.353410605 | 0.451561597 |
| <b>JHOC-5</b>              | 0.250031396 | 0.126321744  | 0.356287864 | 0.244213668 |
| <b>786-O</b>               | 0.115531916 | 0.168849661  | 0.357048536 | 0.213810038 |
| <b>MDA-MB-157</b>          | 0.163806932 | 0.529481464  | 0.357539554 | 0.350275983 |
| <b>BCP-1</b>               | 0.613935376 | 0.782684969  | 0.357665803 | 0.584762049 |
| <b>G-292, clone A141B1</b> | 0.767555247 | 0.532072154  | 0.360657068 | 0.553428156 |
| <b>NCI-H1915</b>           | 0.479102015 | 0.905715831  | 0.360905641 | 0.581907829 |
| <b>Hs 600.T</b>            | 0.527961827 | 0.808827463  | 0.361016178 | 0.565935156 |
| <b>DMS 273</b>             | 0.460505258 | 0.457889818  | 0.363613348 | 0.427336142 |
| <b>Hs 729</b>              | 0.508332089 | 0.481108961  | 0.364216218 | 0.451219089 |
| <b>SK-LU-1</b>             | 0.277184144 | 0.433016367  | 0.364511422 | 0.358237311 |
| <b>Hs 172.T</b>            | 0.505252414 | 0.928691895  | 0.371774972 | 0.601906427 |
| <b>KYSE-520</b>            | 0.425275811 | 0.282673419  | 0.372110599 | 0.360019943 |
| <b>NB-1</b>                | 0.451416069 | 0.577352854  | 0.372455769 | 0.467074897 |
| <b>8305C</b>               | 0.523266444 | 0.842847439  | 0.373682706 | 0.579932196 |
| <b>Caki-1</b>              | 0.004658391 | 0.221659017  | 0.377425655 | 0.201247688 |
| <b>TO 175.T</b>            | 0.533377841 | 0.730597522  | 0.379358616 | 0.547777993 |
| <b>CAL-78</b>              | 0.33144161  | 0.406449955  | 0.381527818 | 0.373139795 |
| <b>SJRH30</b>              | 0.321792947 | 0.583749374  | 0.382208714 | 0.429250345 |

|             |              |             |             |             |
|-------------|--------------|-------------|-------------|-------------|
| NCI-H2052   | 0.68432228   | 0.520589359 | 0.384384815 | 0.529765485 |
| Hs 934.T    | 0.635168866  | 0.613406925 | 0.384637587 | 0.544404459 |
| AN3 CA      | 0.377955463  | 0.428220013 | 0.385475075 | 0.39721685  |
| OUMS-27     | 0.578177445  | 0.497885703 | 0.386344379 | 0.487469175 |
| KMRC-2      | 0.077195778  | 0.26998018  | 0.389744677 | 0.245640212 |
| Hs 895.T    | 0.527545105  | 1.036126637 | 0.38979091  | 0.651154217 |
| M059K       | 0.314530131  | 0.28389811  | 0.394799906 | 0.331076049 |
| Hs 739.T    | 0.371825995  | 0.964040062 | 0.397433648 | 0.577766568 |
| NCI-H716    | 0.402878887  | 0.757526586 | 0.399897621 | 0.520101031 |
| SNU-423     | 0.828370259  | 0.548352464 | 0.402165362 | 0.592962695 |
| KELLY       | 0.444080013  | 0.79881443  | 0.403979883 | 0.548958109 |
| NCI-H2228   | 0.521297239  | 0.375994833 | 0.405941448 | 0.434411173 |
| RH-41       | 0.390302494  | 0.630966467 | 0.406176922 | 0.475815295 |
| BHT-101     | -0.022498363 | 0.104490477 | 0.40729725  | 0.163096455 |
| NCI-H524    | 0.367352531  | 0.556729151 | 0.407461578 | 0.443847753 |
| Hs 688(A).T | 0.512935328  | 0.831008962 | 0.407568282 | 0.583837524 |
| JHH-6       | 0.749979371  | 0.354788003 | 0.411865614 | 0.50554433  |
| LN-18       | 0.29109867   | 0.66489422  | 0.413317405 | 0.456436765 |
| 42-MG-BA    | 0.378267732  | 0.674794735 | 0.413941039 | 0.489001168 |
| NCI-H2227   | 0.456405545  | 0.551720803 | 0.416674857 | 0.474933735 |
| MFE-296     | 0.286318375  | 0.362647162 | 0.422790062 | 0.357251866 |
| COV504      | 0.685888941  | 0.599987127 | 0.425299563 | 0.570391877 |
| Hs 281.T    | 0.576119484  | 0.933716754 | 0.427994618 | 0.645943619 |
| NCI-H2405   | 0.124428878  | 0.121305347 | 0.428260619 | 0.224664948 |
| MDA-MB-361  | 0.987271422  | 0.252679701 | 0.428787258 | 0.556246127 |
| JHUEM-2     | 0.348665219  | 0.742973919 | 0.430674537 | 0.507437892 |
| NCI-H28     | 0.397355014  | 0.71398044  | 0.433394261 | 0.514909905 |
| HARA        | 0.603067464  | 0.412589232 | 0.433474686 | 0.483043794 |
| CJM         | 0.645222896  | 0.420760094 | 0.433956358 | 0.499979783 |
| KP4         | 0.46479526   | 0.378528926 | 0.434445139 | 0.425923108 |
| A-204       | 0.233597047  | 0.388263314 | 0.434636728 | 0.352165696 |
| SIMA        | 0.522577029  | 0.838658551 | 0.435578844 | 0.598938142 |
| COV318      | 0.579405846  | 0.496619611 | 0.439275522 | 0.505100326 |
| TUHR10TKB   | 0.171463275  | 0.063794668 | 0.440840872 | 0.225366272 |
| CGTH-W-1    | 0.355586652  | 1.036038295 | 0.44257328  | 0.611399409 |
| IMR-32      | 0.435824545  | 0.511747827 | 0.442912529 | 0.463494967 |
| D283 Med    | 0.316977182  | 0.297930162 | 0.443156988 | 0.352688111 |
| RERF-LC-Sq1 | 0.593080151  | 0.190311139 | 0.446180966 | 0.409857419 |
| NCI-H1755   | 0.69499222   | 0.592046437 | 0.446521025 | 0.577853227 |
| SNU-475     | 0.324058509  | 0.516061988 | 0.448810665 | 0.429643721 |
| HCC1395     | 0.574610424  | 0.741913807 | 0.449895458 | 0.588806563 |
| ACHN        | 0.415988652  | 0.251932917 | 0.450568459 | 0.372830009 |
| NCI-H1694   | 0.394251169  | 0.520886076 | 0.453582652 | 0.456239966 |
| COLO-320    | 0.441020913  | 0.789439955 | 0.459227152 | 0.56322934  |
| NCI-H1341   | 0.534548689  | 0.547335972 | 0.46118912  | 0.514357927 |
| SH-SY5Y     | 0.472231499  | 0.638803817 | 0.462255375 | 0.52443023  |
| NCI-H1155   | 0.296098992  | 0.568031762 | 0.463614324 | 0.442581693 |

|                 |              |              |             |             |
|-----------------|--------------|--------------|-------------|-------------|
| TOV-21G         | -0.061738976 | 0.660243507  | 0.46503577  | 0.354513433 |
| SK-N-DZ         | 0.432340531  | 0.626547742  | 0.467261612 | 0.508716628 |
| KP-N-YN         | 0.347213722  | 0.576250081  | 0.467316063 | 0.463593289 |
| KP-N-RT-BM-1    | 0.490608045  | 0.633812746  | 0.47015749  | 0.531526094 |
| BFTC-909        | 0.555946744  | 0.795092535  | 0.471844016 | 0.607627765 |
| Hs 604.T        | 0.654528062  | 0.890860808  | 0.472173467 | 0.672520779 |
| OPM-2           | 0.275059318  | 0.689393469  | 0.472711499 | 0.479054762 |
| SNU-398         | 0.473031232  | 0.717387453  | 0.474235057 | 0.554884581 |
| T1-73           | 0.42887933   | 0.904000628  | 0.477163962 | 0.603347973 |
| NCI-H446        | 0.767208405  | 0.588510369  | 0.477164052 | 0.610960942 |
| QGP-1           | 0.782517808  | -0.033873713 | 0.477764136 | 0.408802744 |
| OV56            | 0.147342522  | 0.392088867  | 0.47916539  | 0.33953226  |
| NCI-H1184       | 0.380187546  | 0.558098763  | 0.480667709 | 0.472984673 |
| NCI-H661        | 0.045463526  | 0.73649478   | 0.48203363  | 0.421330646 |
| EJM             | 0.438351765  | 0.761713727  | 0.4832609   | 0.561108797 |
| KMRC-3          | 0.296964432  | 0.351233928  | 0.483429283 | 0.377209214 |
| PC-3            | 0.835406266  | 0.328257173  | 0.487738881 | 0.55046744  |
| 639-V           | 0.647245066  | 0.409855849  | 0.487865931 | 0.514988949 |
| VMRC-RCZ        | 0.331913136  | 0.181764633  | 0.488277776 | 0.333985182 |
| HCC-366         | 0.475090377  | 0.332752928  | 0.488344372 | 0.432062559 |
| SNU-1077        | 0.527575709  | 0.287117396  | 0.489858169 | 0.434850425 |
| HLF             | 0.556028175  | 0.38905805   | 0.490243201 | 0.478443142 |
| TOV-112D        | 0.39851622   | 0.787542381  | 0.490934324 | 0.558997642 |
| KYSE-70         | 0.679852023  | 0.472689447  | 0.491161759 | 0.547901076 |
| BICR 16         | 0.705531108  | 0.243912668  | 0.491720443 | 0.480388073 |
| SKM-1           | 0.411171067  | 0.745640631  | 0.491868506 | 0.549560068 |
| Hs 229.T        | 0.53821058   | 1.023294871  | 0.496262129 | 0.685922527 |
| BC-3C           | 0.55371768   | 0.338446989  | 0.498060071 | 0.463408246 |
| TUHR4TKB        | 0.226446323  | 0.30422008   | 0.501670267 | 0.344112223 |
| SW-1710         | 0.342375464  | 0.170121585  | 0.502989799 | 0.338495616 |
| Hs 870.T        | 0.478900211  | 0.819990209  | 0.504045629 | 0.600978683 |
| SK-N-MC         | 0.478126207  | 0.704199923  | 0.50416866  | 0.56216493  |
| HCC1569         | 0.54092177   | 0.634242316  | 0.504296747 | 0.559820278 |
| PLC/PRF/5       | 0.214753182  | 0.218067568  | 0.505292893 | 0.312704548 |
| Li-7            | 0.458913065  | 0.243557962  | 0.509065193 | 0.403845407 |
| NCI-H1581       | 0.17969238   | 0.348045741  | 0.509268758 | 0.34566896  |
| MHH-ES-1        | 0.626106008  | 0.762895943  | 0.509940048 | 0.632980667 |
| CHP-126         | 0.587085842  | 0.726674487  | 0.510599962 | 0.608120097 |
| PSN1            | 0.330165092  | 0.189920913  | 0.51403166  | 0.344705888 |
| Alexander cells | 0.258417706  | 0.164961363  | 0.515044698 | 0.312807922 |
| SK-ES-1         | 0.484359765  | 0.659170367  | 0.516181758 | 0.553237297 |
| Hs 819.T        | 0.761710612  | 0.902010119  | 0.518165282 | 0.727295337 |
| PE/CA-PJ49      | 0.540448876  | 0.474664948  | 0.518532894 | 0.511215573 |
| Calu-6          | 0.09915363   | 0.473927293  | 0.519050955 | 0.364043959 |
| NCI-H1703       | 0.219359923  | 0.23262475   | 0.522021373 | 0.324668682 |
| OV7             | 0.579652036  | 0.649937216  | 0.523978865 | 0.584522706 |
| SNU-5           | 0.035107221  | 0.157254774  | 0.524585784 | 0.238982593 |



|            |              |              |             |             |
|------------|--------------|--------------|-------------|-------------|
| NCI-H2452  | 0.573844397  | 0.694628587  | 0.532645837 | 0.60037294  |
| NCI-H520   | 0.287634521  | 0.078405154  | 0.533661341 | 0.299900339 |
| NCI-H522   | 0.277567083  | 0.744924865  | 0.534471098 | 0.518987682 |
| MIA PaCa-2 | 0.143305857  | 0.327217635  | 0.535182909 | 0.335235467 |
| Hs 737.T   | 0.586017669  | 0.931749841  | 0.535979406 | 0.684582305 |
| OCI-AML3   | 0.279781765  | 0.859448813  | 0.537254378 | 0.558828319 |
| ECC10      | 0.590668881  | 0.6921606    | 0.537716365 | 0.606848615 |
| NCI-H841   | 0.400320636  | 0.759674085  | 0.54015082  | 0.566715181 |
| KP-3       | 0.154405339  | 0.472281181  | 0.540192709 | 0.388959743 |
| TT         | 0.65771234   | 0.266519629  | 0.541362085 | 0.488531351 |
| YD-15      | 0.778370325  | 0.605547773  | 0.541648362 | 0.641855486 |
| NCI-H23    | 0.408727923  | 0.926877808  | 0.542531757 | 0.62604583  |
| OAW42      | 0.230472436  | 0.64427119   | 0.544259728 | 0.473001118 |
| OV-90      | 0.471825349  | 0.730542879  | 0.546535893 | 0.58296804  |
| LC-1/sq-SF | 0.546134806  | 0.485609112  | 0.547869855 | 0.526537925 |
| NCI-H82    | 0.538517986  | 0.555020073  | 0.54877735  | 0.54743847  |
| DMS 114    | 0.472161983  | 0.85086747   | 0.54895923  | 0.623996228 |
| CAL-54     | 0.31428584   | 0.57591008   | 0.551589852 | 0.480595257 |
| JVM-2      | 0.488263846  | 0.808530789  | 0.553051234 | 0.616615289 |
| KYSE-140   | 0.72008966   | 0.307033941  | 0.553366038 | 0.52682988  |
| TT2609-C02 | 0.327767003  | 0.867167294  | 0.554016783 | 0.582983694 |
| A3/KAW     | 0.51324679   | 0.772592067  | 0.557995805 | 0.614611554 |
| KYO-1      | 0.402980579  | 0.467516123  | 0.558055646 | 0.476184116 |
| A2780      | 0.395559607  | 0.698343374  | 0.558549029 | 0.550817337 |
| OCI-AML5   | 0.406790479  | 0.898976901  | 0.558590566 | 0.621452648 |
| NCI-H2066  | 0.507300738  | 0.730991049  | 0.559008734 | 0.599100174 |
| JIMT-1     | 0.806924158  | 0.226563255  | 0.559145017 | 0.530877477 |
| SCaBER     | 0.585838312  | 0.488411076  | 0.559393878 | 0.544547755 |
| DAN-G      | 0.460764407  | -0.110834671 | 0.559606107 | 0.303178614 |
| Hs 578T    | 0.727914343  | 0.742600931  | 0.559752937 | 0.67675607  |
| KHM-1B     | 0.406037815  | 0.887628629  | 0.56002323  | 0.617896558 |
| HL-60      | 0.62365674   | 0.732646691  | 0.560820972 | 0.639041468 |
| VMRC-RCW   | 0.729713744  | 0.57230675   | 0.561921208 | 0.621313901 |
| LK-2       | 0.442445515  | 0.236775269  | 0.562081078 | 0.413767287 |
| SJSA-1     | 0.399664723  | 0.828286829  | 0.562593296 | 0.596848283 |
|            | 697          | 0.461488961  | 0.657032586 | 0.563057848 |
| GSS        | 0.495375241  | 0.39107269   | 0.563964726 | 0.483470886 |
| U266B1     | 0.411910206  | 0.763686295  | 0.564132792 | 0.579909764 |
| NCI-H1930  | 0.518076607  | 0.699241998  | 0.565575322 | 0.594297976 |
| SNU-182    | 0.35187411   | 0.864656552  | 0.566835362 | 0.594455341 |
| HEC-50B    | -0.061333655 | 0.366279771  | 0.566969451 | 0.290638522 |
| BDCM       | 0.57799664   | 0.923602277  | 0.56725603  | 0.689618316 |
| P3HR-1     | 0.545877695  | 0.822152964  | 0.567572603 | 0.645201087 |
| COLO-704   | 0.622523237  | 0.638980229  | 0.569085856 | 0.610196441 |
| CPC-N      | 0.645529361  | 0.616273118  | 0.569646408 | 0.610482962 |
| NCI-H1963  | 0.437550943  | 0.425260252  | 0.571810764 | 0.47820732  |
| U-937      | 0.474661774  | 0.926206996  | 0.571839991 | 0.657569587 |

|                              |             |             |             |             |
|------------------------------|-------------|-------------|-------------|-------------|
| <b>D341 Med</b>              | 0.566058117 | 0.756765733 | 0.572205007 | 0.631676286 |
| <b>A-704</b>                 | 0.200733884 | 0.383502076 | 0.572235743 | 0.385490568 |
| <b>Raji</b>                  | 0.468272844 | 0.834741584 | 0.573327126 | 0.625447185 |
| <b>KMS-34</b>                | 0.526560314 | 0.859685113 | 0.574313794 | 0.65351974  |
| <b>HCC-33</b>                | 0.48330093  | 0.561819487 | 0.574435541 | 0.539851986 |
| <b>SNU-449</b>               | 0.592078846 | 0.248475905 | 0.575080747 | 0.471878499 |
| <b>K-562</b>                 | 0.607062319 | 0.521121301 | 0.575347051 | 0.567843557 |
| <b>KMRC-20</b>               | 0.496083815 | 0.792713959 | 0.575443513 | 0.621413763 |
| <b>G-402</b>                 | 0.503803627 | 0.958005349 | 0.575711116 | 0.679173379 |
| <b>SNU-410</b>               | 0.517689793 | 0.615823446 | 0.577916362 | 0.570476534 |
| <b>TYK-nu</b>                | 0.248698436 | 0.728262539 | 0.578644838 | 0.518535271 |
| <b>SBC-5</b>                 | 0.327683748 | 0.843891541 | 0.580291993 | 0.583955761 |
| <b>SEM</b>                   | 0.445540841 | 0.824581433 | 0.580331135 | 0.616817803 |
| <b>KASUMI-1</b>              | 0.426766111 | 0.899006521 | 0.581854054 | 0.635875562 |
| <b>CAL-120</b>               | 0.560681777 | 0.553514689 | 0.583098902 | 0.565765123 |
| <b>PL-21</b>                 | 0.42047423  | 0.882005108 | 0.583272889 | 0.628584076 |
| <b>PANC-1</b>                | 0.137006977 | 0.16447133  | 0.583592027 | 0.295023444 |
| <b>IA-LM</b>                 | 0.157275404 | 0.53523347  | 0.583806559 | 0.425438478 |
| <b>SUP-T1</b>                | 0.666017018 | 0.853167836 | 0.583856921 | 0.701013925 |
| <b>RPMI 6666</b>             | 0.494505973 | 0.84220554  | 0.583926182 | 0.640212565 |
| <b>KLE</b>                   | 0.479938603 | 0.619924328 | 0.584215616 | 0.561359516 |
|                              | <b>5637</b> | 0.766062367 | 0.583633304 | 0.584808263 |
| <b>PCM6</b>                  | 0.286705941 | 0.949682085 | 0.585821089 | 0.607403038 |
| <b>YD-10B</b>                | 0.609058826 | 0.573592619 | 0.586130217 | 0.589593887 |
| <b>Hs 698.T</b>              | 0.693078622 | 1.204979318 | 0.586828896 | 0.828295612 |
| <b>NCI-H929</b>              | 0.488890708 | 0.863372887 | 0.586831938 | 0.646365178 |
| <b>769-P</b>                 | 0.228451868 | 0.310989005 | 0.58735159  | 0.375597487 |
| <b>HuH-7</b>                 | 0.418063048 | 0.98856166  | 0.587958721 | 0.664861143 |
| <b>BL-41</b>                 | 0.374717044 | 0.908485333 | 0.588573143 | 0.623925174 |
| <b>SCLC-21H</b>              | 0.637738712 | 0.613371766 | 0.588802932 | 0.61330447  |
| <b>PE/CA-PJ41 (clone D2)</b> | 0.751409351 | 0.525966967 | 0.589294975 | 0.622223764 |
| <b>Hs 863.T</b>              | 0.787071997 | 0.932646508 | 0.592172253 | 0.770630253 |
| <b>MC116</b>                 | 0.443817464 | 0.866761457 | 0.593934854 | 0.634837925 |
| <b>YD-8</b>                  | 0.525748722 | 0.482842101 | 0.593972929 | 0.534187918 |
| <b>KMS-20</b>                | 0.201337028 | 0.661279191 | 0.594488442 | 0.485701554 |
| <b>JURL-MK1</b>              | 0.37204886  | 0.716661765 | 0.596264494 | 0.561658373 |
| <b>OVTOKO</b>                | 0.016459282 | 0.555727874 | 0.59647477  | 0.389553975 |
| <b>ST486</b>                 | 0.446573938 | 0.856444368 | 0.597512875 | 0.633510394 |
| <b>RERF-GC-1B</b>            | 0.447261697 | 0.765052735 | 0.597849466 | 0.603387966 |
| <b>L-363</b>                 | 0.440108348 | 0.98742426  | 0.598111861 | 0.675214823 |
| <b>SUIT-2</b>                | 0.23237531  | 0.143661349 | 0.59890902  | 0.324981893 |
| <b>SK-MM-2</b>               | 0.276963286 | 0.804823416 | 0.600445799 | 0.560744167 |
| <b>OCI-LY3</b>               | 0.405745066 | 0.786831136 | 0.601043994 | 0.597873399 |
| <b>SW 1573</b>               | 0.454566269 | 0.525078827 | 0.60108639  | 0.526910495 |
| <b>THP-1</b>                 | 0.489734394 | 0.646890663 | 0.601134072 | 0.579253043 |
| <b>FU-OV-1</b>               | 0.603766937 | 0.405216532 | 0.602766618 | 0.537250029 |
| <b>JM1</b>                   | 0.430041967 | 0.844345228 | 0.603519664 | 0.625968953 |

|                  |             |             |             |             |
|------------------|-------------|-------------|-------------|-------------|
| <b>GA-10</b>     | 0.438435637 | 0.884130708 | 0.604369676 | 0.642312007 |
| <b>Toledo</b>    | 0.392985727 | 0.889877917 | 0.605057452 | 0.629307032 |
| <b>SHP-77</b>    | 0.62531811  | 0.639384047 | 0.605120178 | 0.623274112 |
| <b>NCI-H211</b>  | 0.643673409 | 0.467774958 | 0.6069083   | 0.572785556 |
| <b>RCC10RGB</b>  | 0.687261665 | 0.553575079 | 0.607817425 | 0.616218056 |
| <b>Daudi</b>     | 0.600834719 | 0.858360912 | 0.607947906 | 0.689047845 |
| <b>KMS-28BM</b>  | 0.433528967 | 0.861913766 | 0.608831977 | 0.634758237 |
| <b>Caki-2</b>    | 0.226784661 | 0.737845337 | 0.608875707 | 0.524501902 |
| <b>EFO-21</b>    | 0.309212612 | 0.605279402 | 0.610014002 | 0.508168672 |
| <b>LP-1</b>      | 0.516162476 | 0.960629784 | 0.610505877 | 0.695766046 |
| <b>BL-70</b>     | 0.481510994 | 0.897876269 | 0.611384812 | 0.663590692 |
| <b>Hs 751.T</b>  | 0.67214788  | 1.107462145 | 0.611426218 | 0.797012081 |
| <b>SU-DHL-8</b>  | 0.409989305 | 0.778568353 | 0.612347938 | 0.600301865 |
| <b>CAL-85-1</b>  | 0.582318218 | 0.167653962 | 0.612782342 | 0.454251508 |
| <b>HSC-2</b>     | 0.615984789 | 0.731733841 | 0.612888106 | 0.653535579 |
| <b>JeKo-1</b>    | 0.37418927  | 0.9210335   | 0.613080412 | 0.636101061 |
| <b>DND-41</b>    | 0.455039957 | 0.933416044 | 0.613555687 | 0.667337229 |
| <b>Loucy</b>     | 0.376612196 | 0.994620389 | 0.613960897 | 0.661731161 |
| <b>COV434</b>    | 0.426229874 | 0.978406318 | 0.614233446 | 0.672956546 |
| <b>NCI-H2171</b> | 0.53156035  | 0.53788085  | 0.616550316 | 0.561997172 |
| <b>FU97</b>      | 0.435531811 | 0.809185217 | 0.616789203 | 0.620502077 |
| <b>RI-1</b>      | 0.414363927 | 0.912053521 | 0.617133274 | 0.647850241 |
| <b>MEC-1</b>     | 0.441421998 | 0.948111163 | 0.617146434 | 0.668893198 |
| <b>SNU-1214</b>  | 0.610362179 | 0.645781329 | 0.617733386 | 0.624625631 |
| <b>SNU-1272</b>  | 0.398412433 | 0.57737216  | 0.617832867 | 0.53120582  |
| <b>MOLT-16</b>   | 0.498690073 | 0.813372331 | 0.618212672 | 0.643425025 |
| <b>Hs 821.T</b>  | 0.608465164 | 1.004622987 | 0.618308975 | 0.743799042 |
| <b>Reh</b>       | 0.437106521 | 0.940478203 | 0.618412211 | 0.665332312 |
| <b>OC 314</b>    | 0.506929538 | 0.83956517  | 0.619077371 | 0.655190693 |
| <b>NCI-H1734</b> | 0.479695575 | 0.668858362 | 0.619106414 | 0.589220117 |
| <b>RPMI-8402</b> | 0.355844181 | 0.915062075 | 0.619150128 | 0.630018795 |
| <b>JHH-7</b>     | 0.48351841  | 0.77211771  | 0.620074198 | 0.625236773 |
| <b>OVK18</b>     | 0.541844952 | 0.592542082 | 0.620544466 | 0.584977167 |
| <b>EB1</b>       | 0.36999393  | 0.896972149 | 0.62072364  | 0.629229906 |
| <b>KMS-27</b>    | 0.471704997 | 1.044422683 | 0.621184995 | 0.712437558 |
| <b>SNU-1</b>     | 0.298334511 | 0.678975032 | 0.621785081 | 0.533031542 |
| <b>HT</b>        | 0.491514445 | 0.889376786 | 0.622177658 | 0.667689629 |
| <b>KYM-1</b>     | 0.039994242 | 0.885897766 | 0.622422839 | 0.516104949 |
| <b>TE 441.T</b>  | 0.357718985 | 0.98291838  | 0.622451148 | 0.654362838 |
| <b>SUP-B15</b>   | 0.434665166 | 0.955071434 | 0.622914072 | 0.670883557 |
| <b>TE-11</b>     | 0.829762639 | 0.529856478 | 0.622993477 | 0.660870865 |
| <b>L-1236</b>    | 0.541184301 | 0.533258339 | 0.623267637 | 0.565903426 |
| <b>CA46</b>      | 0.415345965 | 0.87864024  | 0.624367296 | 0.639451167 |
| <b>SW 1271</b>   | 0.749858076 | 0.860070624 | 0.62458441  | 0.744837703 |
| <b>NALM-6</b>    | 0.39883371  | 0.923364389 | 0.625325356 | 0.649174485 |
| <b>IST-MES2</b>  | 0.928886407 | 0.654796809 | 0.625376499 | 0.736353238 |
| <b>MFE-319</b>   | 0.428372989 | 0.661374932 | 0.625841021 | 0.571862981 |

|                   |             |              |             |             |
|-------------------|-------------|--------------|-------------|-------------|
| <b>MONO-MAC-6</b> | 0.458928436 | 0.780526794  | 0.625874312 | 0.621776514 |
| <b>OCI-AML2</b>   | 0.38652552  | 0.968040525  | 0.628390095 | 0.66098538  |
| <b>Hs 616.T</b>   | 0.703234959 | 1.051818615  | 0.628574097 | 0.794542557 |
| <b>SU-DHL-6</b>   | 0.541566183 | 0.88396262   | 0.629052825 | 0.684860542 |
| <b>NCI-H1105</b>  | 0.474402152 | 0.567442613  | 0.629255832 | 0.557033532 |
| <b>NCI-H1563</b>  | 0.381348124 | 0.86056611   | 0.630272171 | 0.624062135 |
| <b>NB-4</b>       | 0.476826847 | 0.709491252  | 0.630729525 | 0.605682542 |
| <b>NCI-H1048</b>  | 0.755469423 | 0.582576049  | 0.630829616 | 0.656291696 |
| <b>SUP-HD1</b>    | 0.606056703 | 0.680919588  | 0.630878342 | 0.639284878 |
| <b>KMS-26</b>     | 0.467807544 | 1.151409006  | 0.631002678 | 0.750073076 |
| <b>MOLT-13</b>    | 0.462362765 | 0.88556979   | 0.631317421 | 0.659749992 |
| <b>EFE-184</b>    | 0.780940312 | 0.611239121  | 0.631395797 | 0.674525077 |
| <b>AsPC-1</b>     | 0.329118019 | 0.319767071  | 0.631599437 | 0.426828176 |
| <b>SNU-503</b>    | 0.697828701 | 0.343829651  | 0.631764044 | 0.557807466 |
| <b>Hs 274.T</b>   | 0.775435474 | 1.22577601   | 0.631811722 | 0.877674402 |
| <b>EPLC-272H</b>  | 0.822691344 | 0.618487198  | 0.631981895 | 0.691053479 |
| <b>HEC-59</b>     | 0.501050002 | 0.529771269  | 0.632361688 | 0.55439432  |
| <b>BV-173</b>     | 0.294613822 | 1.116520164  | 0.633022355 | 0.681385447 |
| <b>SCC-9</b>      | 0.664074119 | 0.772002548  | 0.634274592 | 0.690117086 |
| <b>HPB-ALL</b>    | 0.499652481 | 0.81372316   | 0.634358422 | 0.649244688 |
| <b>NUGC-2</b>     | 1.038210934 | 0.51248872   | 0.634974772 | 0.728558142 |
| <b>TE-8</b>       | 0.488110759 | 0.734656515  | 0.636860847 | 0.61987604  |
| <b>CML-T1</b>     | 0.337764837 | 0.875868873  | 0.6372611   | 0.616964937 |
| <b>SU-DHL-10</b>  | 0.604246189 | 0.906603986  | 0.637523098 | 0.716124424 |
| <b>HCC1937</b>    | 0.465754626 | -0.090238868 | 0.638543933 | 0.338019897 |
| <b>NCI-H2172</b>  | 0.68505687  | 0.847834206  | 0.638782862 | 0.723891313 |
| <b>SU-DHL-5</b>   | 0.54882491  | 0.966378572  | 0.639303421 | 0.718168968 |
| <b>KYSE-270</b>   | 0.686739462 | 0.72816299   | 0.640536217 | 0.685146223 |
| <b>MHH-CALL-2</b> | 0.407711744 | 0.81425295   | 0.641394882 | 0.621119859 |
| <b>A4/Fuk</b>     | 0.524821169 | 0.86349585   | 0.642128166 | 0.676815062 |
| <b>BICR 18</b>    | 0.69549808  | 0.477316609  | 0.642449935 | 0.605088208 |
| <b>RS4;11</b>     | 0.457674544 | 0.915741198  | 0.642746389 | 0.672054044 |
| <b>Panc 02.13</b> | 1.039772103 | 0.585095834  | 0.64297213  | 0.755946689 |
| <b>REC-1</b>      | 0.494342584 | 0.866710545  | 0.643042278 | 0.668031802 |
| <b>PEER</b>       | 0.456003538 | 0.860451981  | 0.643138823 | 0.653198114 |
| <b>EB2</b>        | 0.470648893 | 0.873057966  | 0.643324098 | 0.662343652 |
| <b>EHEB</b>       | 0.603364732 | 0.837591962  | 0.643893223 | 0.694949972 |
| <b>SNU-738</b>    | 0.717374309 | 0.826775728  | 0.644949053 | 0.729699697 |
| <b>OUMS-23</b>    | 0.435311087 | 0.559626508  | 0.64510899  | 0.546682195 |
| <b>G-401</b>      | 0.236047215 | 0.724248876  | 0.645199513 | 0.535165202 |
| <b>IGROV1</b>     | 0.465527243 | 0.883280427  | 0.645423368 | 0.664743679 |
| <b>MOLP-8</b>     | 0.313490126 | 1.15876535   | 0.645767764 | 0.706007746 |
| <b>HCC1187</b>    | 0.683288019 | 0.413110137  | 0.646800097 | 0.581066084 |
| <b>J82</b>        | 0.489239441 | 0.723764044  | 0.647731147 | 0.620244877 |
| <b>TE 617.T</b>   | 0.382422699 | 0.95203926   | 0.647888532 | 0.660783497 |
| <b>8505C</b>      | 0.751159372 | 0.936916571  | 0.64800303  | 0.778692991 |
| <b>NCI-H1666</b>  | 0.757714012 | 0.742548255  | 0.648335989 | 0.716199419 |

|              |             |             |             |             |
|--------------|-------------|-------------|-------------|-------------|
| SCC-4        | 0.846689472 | 0.730574753 | 0.649365331 | 0.742209852 |
| SIG-M5       | 0.349607032 | 1.001067147 | 0.649564234 | 0.666746138 |
| P12-ICHIKAWA | 0.486865742 | 0.855136877 | 0.650019508 | 0.664007376 |
| JURKAT       | 0.513936433 | 0.769821695 | 0.650189874 | 0.644649334 |
| NALM-1       | 0.299764874 | 0.937872824 | 0.650278134 | 0.629305277 |
| EC-GI-10     | 0.68139615  | 0.612902041 | 0.650343059 | 0.64821375  |
| KM-H2        | 0.4553962   | 0.772204415 | 0.651127133 | 0.626242583 |
| BHY          | 0.725931425 | 0.685291527 | 0.651266052 | 0.687496334 |
| SNU-761      | 0.813541023 | 0.707944302 | 0.651574425 | 0.72435325  |
| MONO-MAC-1   | 0.481418307 | 0.856435753 | 0.652686333 | 0.663513464 |
| NCI-H69      | 0.783152334 | 0.729370286 | 0.652711922 | 0.721744848 |
| KMS-12-BM    | 0.299549833 | 0.893282718 | 0.652761035 | 0.615197862 |
| RL           | 0.549314984 | 0.969444942 | 0.652816547 | 0.723858824 |
| ECC12        | 0.782838568 | 0.770295385 | 0.653954392 | 0.735696115 |
| NCI-H838     | 0.507466115 | 0.708547745 | 0.654020561 | 0.623344807 |
| PF-382       | 0.464495048 | 0.84940259  | 0.654423425 | 0.656107021 |
| JL-1         | 0.883796526 | 0.738076236 | 0.65519967  | 0.759024144 |
| OVMANA       | 0.195878292 | 0.288168478 | 0.65543991  | 0.379828893 |
| T84          | 0.885935248 | 0.563225739 | 0.655462677 | 0.701541222 |
| Hs 940.T     | 0.83509422  | 1.133987801 | 0.6555319   | 0.874871307 |
| SW579        | 0.834264402 | 1.071396829 | 0.655731429 | 0.853797553 |
| RCH-ACV      | 0.390647885 | 0.858810523 | 0.655876207 | 0.635111538 |
| NCI-H1436    | 0.583565196 | 0.696718458 | 0.656195172 | 0.645492942 |
| MEG-01       | 0.599001911 | 0.640046731 | 0.656583878 | 0.631877507 |
| DB           | 0.555231972 | 0.930427759 | 0.656704063 | 0.714121265 |
| RD-ES        | 0.53138171  | 0.897658527 | 0.657157126 | 0.695399121 |
| SK-HEP-1     | 0.680588228 | 0.731840307 | 0.657630057 | 0.69001953  |
| NU-DUL-1     | 0.56455801  | 0.914072518 | 0.660378806 | 0.713003112 |
| Set-2        | 0.44283783  | 0.739787287 | 0.661075864 | 0.614566993 |
| A-673        | 0.745061135 | 1.084636882 | 0.661131799 | 0.830276605 |
| SUP-M2       | 0.455484889 | 0.981004142 | 0.661446163 | 0.699311732 |
| HuNS1        | 0.519131787 | 1.129188226 | 0.661486292 | 0.769935435 |
| MHH-CALL-3   | 0.404412191 | 0.949460585 | 0.662180153 | 0.672017643 |
| JVM-3        | 0.39439911  | 0.996677545 | 0.662344003 | 0.684473553 |
| KE-37        | 0.544010325 | 0.888775921 | 0.662449612 | 0.698411952 |
| COR-L311     | 0.563819518 | 0.500969702 | 0.662698279 | 0.575829166 |
| JHUEM-3      | 0.4843208   | 0.614762054 | 0.6627948   | 0.587292551 |
| T24          | 0.796668919 | 0.901957753 | 0.663364591 | 0.787330421 |
| HCC-2279     | 0.519777316 | 0.321083631 | 0.663567727 | 0.501476225 |
| NCI-H2009    | 0.743113815 | 0.641753663 | 0.664755488 | 0.683207655 |
| HOS          | 0.689729556 | 0.89321586  | 0.665734222 | 0.749559879 |
| MHH-CALL-4   | 0.405803325 | 0.901691891 | 0.667059389 | 0.658184868 |
| MM1-S        | 0.529583713 | 0.900191478 | 0.6673288   | 0.699034664 |
| Pfeiffer     | 0.45702161  | 0.873781277 | 0.667483624 | 0.666095504 |
| AZ-521       | 0.361939026 | 1.013341626 | 0.667540353 | 0.680940335 |
| CAL 27       | 0.582081242 | 0.48338435  | 0.667994252 | 0.577819948 |
| CI-1         | 0.524334737 | 1.02561747  | 0.66809159  | 0.739347932 |

|                   |             |             |             |             |
|-------------------|-------------|-------------|-------------|-------------|
| <b>HSC-3</b>      | 0.674551008 | 0.903061755 | 0.668289327 | 0.74863403  |
| <b>MOLM-16</b>    | 0.414094274 | 0.783538167 | 0.668510862 | 0.622047767 |
| <b>Mino</b>       | 0.496351702 | 1.001427098 | 0.669338993 | 0.722372598 |
| <b>RERF-LC-AI</b> | 0.665485727 | 0.613834764 | 0.669718971 | 0.649679821 |
| <b>CAL-51</b>     | 0.420150571 | 0.586072134 | 0.670446918 | 0.558889874 |
| <b>NCI-H1618</b>  | 0.592203603 | 0.730175218 | 0.670653958 | 0.66434426  |
| <b>KARPAS-620</b> | 0.412081834 | 0.830896012 | 0.671742159 | 0.638240002 |
| <b>MFE-280</b>    | 0.452990006 | 0.817469387 | 0.673463157 | 0.647974183 |
| <b>MEC-2</b>      | 0.459544248 | 0.965632053 | 0.673796668 | 0.699657656 |
| <b>A-253</b>      | 0.573317232 | 0.7521324   | 0.673890405 | 0.666446679 |
| <b>NCI-H1876</b>  | 0.63439364  | 0.836280914 | 0.676191198 | 0.715621917 |
| <b>F-36P</b>      | 0.378902646 | 0.752555541 | 0.677002648 | 0.602820279 |
| <b>M-07e</b>      | 0.470040677 | 0.761624818 | 0.678072168 | 0.636579221 |
| <b>OC 316</b>     | 0.507821383 | 1.027976756 | 0.678088945 | 0.737962361 |
| <b>DOHH-2</b>     | 0.480290175 | 1.102281427 | 0.678438017 | 0.753669873 |
| <b>VCaP</b>       | 0.826830544 | 0.683355785 | 0.679114667 | 0.729766998 |
| <b>NCI-H2081</b>  | 0.70332357  | 0.612533394 | 0.679490034 | 0.665115666 |
| <b>TC-71</b>      | 0.626472545 | 1.044610656 | 0.680272982 | 0.783785394 |
| <b>KNS-62</b>     | 0.497643779 | 0.726245509 | 0.681361044 | 0.635083444 |
| <b>NCI-H1092</b>  | 0.631337659 | 0.756257062 | 0.681941081 | 0.689845267 |
| <b>COR-L24</b>    | 0.82213735  | 0.592156781 | 0.682718047 | 0.69900406  |
| <b>NCI-H647</b>   | 0.73346199  | 0.937831698 | 0.682857534 | 0.784717074 |
| <b>MDA PCa 2b</b> | 0.591170427 | 0.543925935 | 0.683743081 | 0.606279814 |
| <b>HDLM-2</b>     | 0.672232963 | 0.744064146 | 0.684259411 | 0.700185507 |
| <b>SCC-15</b>     | 0.754804431 | 0.63940812  | 0.684380815 | 0.692864455 |
| <b>NCI-H1385</b>  | 0.515136164 | 0.500388366 | 0.684501266 | 0.566675265 |
| <b>SNU-C2A</b>    | 0.679646756 | 0.173259242 | 0.685060209 | 0.512655402 |
| <b>NCI-H2106</b>  | 0.566330669 | 0.693847368 | 0.685082148 | 0.648420062 |
| <b>NOMO-1</b>     | 0.250798386 | 1.03757245  | 0.685243081 | 0.657871305 |
| <b>Hs 611.T</b>   | 0.387928771 | 1.049184906 | 0.685339463 | 0.70748438  |
| <b>NCI-H2030</b>  | 0.524188785 | 0.908978663 | 0.685609869 | 0.706259106 |
| <b>SW1417</b>     | 0.433649169 | 0.399371668 | 0.686074864 | 0.506365234 |
| <b>MOTN-1</b>     | 0.709865526 | 0.887573489 | 0.686118592 | 0.761185869 |
| <b>SW1116</b>     | 0.820945946 | 0.703237147 | 0.687031109 | 0.737071401 |
| <b>SW837</b>      | 0.700416295 | 0.45721991  | 0.687948455 | 0.615194887 |
| <b>SU-DHL-4</b>   | 0.580143628 | 1.167193535 | 0.688685654 | 0.812007606 |
| <b>BICR 56</b>    | 0.73799087  | 0.565462364 | 0.688744996 | 0.664066077 |
| <b>HuCCT1</b>     | 0.610407507 | 0.205956833 | 0.689055725 | 0.501806688 |
| <b>HPAF-II</b>    | 0.622976535 | 0.382065624 | 0.689949342 | 0.564997167 |
| <b>MJ</b>         | 0.565433533 | 0.643571876 | 0.690478087 | 0.633161165 |
| <b>22Rv1</b>      | 0.712577904 | 0.732810259 | 0.691443444 | 0.712277202 |
| <b>COV362</b>     | 0.770154085 | 0.621825375 | 0.69174432  | 0.694574593 |
| <b>MOLP-2</b>     | 0.228578722 | 0.969314272 | 0.691927458 | 0.629940151 |
| <b>HSC-4</b>      | 0.80643602  | 0.531735907 | 0.691994619 | 0.676722182 |
| <b>Calu-1</b>     | 0.928371884 | 1.031068883 | 0.693631996 | 0.884357588 |
| <b>TF-1</b>       | 0.418144596 | 0.682702475 | 0.693927349 | 0.59825814  |
| <b>OVSAHO</b>     | 0.721277994 | 0.554433532 | 0.694001053 | 0.65657086  |

|                        |             |             |             |             |
|------------------------|-------------|-------------|-------------|-------------|
| CMK                    | 0.533902184 | 0.81874503  | 0.694064233 | 0.682237149 |
| MKN1                   | 0.665996519 | 0.615082763 | 0.694674136 | 0.658584473 |
| KYSE-450               | 0.736961372 | 0.636797909 | 0.695712216 | 0.689823833 |
| HuTu 80                | 0.478047215 | 1.049056757 | 0.695832884 | 0.740978952 |
| MV-4-11                | 0.465878921 | 0.921076468 | 0.696122334 | 0.694359241 |
| NCI-H1944              | 0.376853633 | 0.56975594  | 0.697405609 | 0.548005061 |
| NCI-H1373              | 0.6626025   | 0.707757074 | 0.697757298 | 0.689372291 |
| HCT 116                | 0.573565065 | 0.517199418 | 0.698117664 | 0.596294049 |
| KU812                  | 0.451213788 | 0.779866853 | 0.698927788 | 0.643336143 |
| MOLT-4                 | 0.612002233 | 0.901917601 | 0.699681283 | 0.737867039 |
| IST-MES1               | 0.975250934 | 0.837664584 | 0.699712643 | 0.83754272  |
| PE/CA-PJ34 (clone C12) | 0.771859285 | 0.649265361 | 0.700060011 | 0.707061552 |
| HDQ-P1                 | 0.727858761 | 0.4035325   | 0.70177379  | 0.611055017 |
| TALL-1                 | 0.510763142 | 1.088856583 | 0.7023291   | 0.767316275 |
| Hep 3B2.1-7            | 0.561250644 | 0.933133703 | 0.703994012 | 0.732792786 |
| MDA-MB-415             | 0.889064092 | 0.438002073 | 0.704141512 | 0.677069226 |
| C3A                    | 0.627408874 | 0.763009103 | 0.704194957 | 0.698204311 |
| HuH-6                  | 0.660625622 | 0.838856122 | 0.70429634  | 0.734592695 |
| OCI-LY-19              | 0.422755788 | 1.098730955 | 0.704879987 | 0.742122243 |
| SNU-1076               | 0.653132629 | 0.622828424 | 0.705826197 | 0.66059575  |
| MDA-MB-231             | 0.750892148 | 1.076987788 | 0.706245672 | 0.844708536 |
| Ki-JK                  | 0.39263488  | 1.137026559 | 0.706798375 | 0.745486605 |
| JHH-5                  | 0.495372144 | 0.779655252 | 0.707687561 | 0.660904986 |
| KMS-21BM               | 0.314094284 | 1.185410019 | 0.708476309 | 0.735993537 |
| BICR 31                | 0.603746235 | 0.598752663 | 0.708555045 | 0.637017981 |
| BICR 22                | 0.782768841 | 0.590166899 | 0.708745725 | 0.693893821 |
| EFO-27                 | 0.597348035 | 0.663545546 | 0.708837003 | 0.656576862 |
| NCI-H889               | 0.4864748   | 0.547258427 | 0.70942815  | 0.581053792 |
| DU4475                 | 0.291854581 | 0.610540777 | 0.709637226 | 0.537344195 |
| COR-L47                | 0.580145304 | 0.738478769 | 0.709843092 | 0.676155722 |
| L-540                  | 0.430194883 | 1.021797569 | 0.709921177 | 0.720637876 |
| KE-97                  | 0.602853317 | 1.137340022 | 0.710073911 | 0.81675575  |
| KARPAS-299             | 0.466431145 | 0.989579219 | 0.710846957 | 0.722285773 |
| JK-1                   | 0.447741522 | 0.853072414 | 0.711997864 | 0.670937267 |
| HUP-T3                 | 0.8115629   | 0.637470155 | 0.712675943 | 0.720569666 |
| NCI-H2141              | 0.721193816 | 0.620456761 | 0.714332644 | 0.68532774  |
| HH                     | 0.837755916 | 0.809090016 | 0.714616958 | 0.787154297 |
| Caov-3                 | 0.763133674 | 0.556250847 | 0.714642549 | 0.678009023 |
| UT-7                   | 0.400889877 | 0.818787096 | 0.715577291 | 0.645084755 |
| P31/FUJ                | 0.526583089 | 1.000277755 | 0.716836405 | 0.747899083 |
| NCO2                   | 0.441256513 | 0.849826507 | 0.717958864 | 0.669680628 |
| PK-45H                 | 0.997712345 | 0.654719208 | 0.718385137 | 0.79027223  |
| Hep G2                 | 0.647018475 | 0.890634846 | 0.71875852  | 0.75213728  |
| NCI-H1975              | 0.614149738 | 0.295334389 | 0.719180737 | 0.542888288 |
| TCC-PAN2               | 0.434863348 | 0.890798642 | 0.719274076 | 0.681645356 |
| SR-786                 | 0.467555872 | 1.110202439 | 0.721421429 | 0.766393247 |
| FaDu                   | 0.816377565 | 0.535223874 | 0.721812815 | 0.691138085 |

|             |             |             |             |             |
|-------------|-------------|-------------|-------------|-------------|
| SK-OV-3     | 0.752036838 | 0.667612818 | 0.723495447 | 0.714381701 |
| HuT 78      | 0.453642082 | 0.791965147 | 0.724107541 | 0.65657159  |
| HuT 102     | 0.615302464 | 0.974243311 | 0.725353263 | 0.771633013 |
| KCL-22      | 0.371485765 | 0.850391962 | 0.72554005  | 0.649139259 |
| DEL         | 0.317671245 | 1.205665791 | 0.725540408 | 0.749625815 |
| MUTZ-5      | 0.473726472 | 1.062622186 | 0.726051315 | 0.754133324 |
| COR-L88     | 0.695643228 | 0.618448224 | 0.726490273 | 0.680193908 |
| MOLM-6      | 0.576764947 | 0.817454639 | 0.727418334 | 0.70721264  |
| HCC1143     | 0.737776298 | 0.607566309 | 0.72827399  | 0.691205532 |
| KMM-1       | 0.505035527 | 1.14846446  | 0.728747765 | 0.794082584 |
| SNG-M       | 0.24350806  | 0.510512364 | 0.729628974 | 0.494549799 |
| NCI-H2085   | 0.858051294 | 0.840632607 | 0.730381805 | 0.809688569 |
| OVCAR-8     | 0.801190308 | 0.794769928 | 0.730901106 | 0.775620447 |
| WSU-DLCL2   | 0.644009531 | 1.111473744 | 0.731292617 | 0.828925297 |
| KMS-11      | 0.685375567 | 1.115659034 | 0.732015782 | 0.844350128 |
| NCI-H1793   | 0.844367656 | 0.650753934 | 0.732082873 | 0.742401488 |
| RPMI 8226   | 0.791233041 | 1.047219259 | 0.732986833 | 0.857146377 |
| RCM-1       | 0.899287653 | 0.669745208 | 0.73430014  | 0.767777667 |
| NCI-H596    | 0.656264575 | 0.545077693 | 0.734868566 | 0.645403611 |
| LUDLU-1     | 0.827744055 | 0.574377397 | 0.734884651 | 0.712335368 |
| RMG-I       | 0.660041287 | 0.859871178 | 0.735292565 | 0.75173501  |
| KASUMI-2    | 0.367746962 | 0.942360451 | 0.736129699 | 0.682079037 |
| OCI-M1      | 0.49842441  | 0.869241959 | 0.736928946 | 0.701531772 |
| KYSE-180    | 0.752805439 | 0.664366188 | 0.73725886  | 0.718143496 |
| HCC-95      | 0.936254861 | 0.509792141 | 0.737773594 | 0.727940199 |
| HCC1428     | 0.830111719 | 0.514370106 | 0.73813821  | 0.694206678 |
| HEL 92.1.7  | 0.491165568 | 0.743681084 | 0.739757072 | 0.658201241 |
| SNU-1079    | 0.474020543 | 0.417159714 | 0.739873565 | 0.543684607 |
| NALM-19     | 0.450278181 | 1.027995614 | 0.740274371 | 0.739516055 |
| SUP-T11     | 0.536535831 | 1.077696034 | 0.740982301 | 0.785071388 |
| KG-1        | 0.521264328 | 0.874488295 | 0.741581189 | 0.712444604 |
| MOLM-13     | 0.471361645 | 1.015276001 | 0.74217833  | 0.742938659 |
| CAL-62      | 0.574959141 | 0.735369475 | 0.744314425 | 0.684881014 |
| HCC827      | 0.732037494 | 0.219664627 | 0.745987244 | 0.565896455 |
| LoVo        | 0.766497749 | 0.741518683 | 0.746485585 | 0.751500672 |
| TE-14       | 0.794186108 | 0.68393171  | 0.746756323 | 0.741624714 |
| GRANTA-519  | 0.378145549 | 1.190357496 | 0.746971395 | 0.771824814 |
| MDA-MB-468  | 0.560486005 | 0.383416424 | 0.748096058 | 0.563999496 |
| CL-11       | 0.750516325 | 0.490235777 | 0.748473141 | 0.663075081 |
| MCF7        | 0.682075498 | 0.659413233 | 0.748831266 | 0.696773332 |
| SW 1990     | 0.42431022  | 0.657301916 | 0.750273533 | 0.610628557 |
| NCI-H526    | 0.636121535 | 0.62974308  | 0.750287493 | 0.672050702 |
| HCC1806     | 0.748900277 | 0.592623951 | 0.752216852 | 0.697913693 |
| KPL-1       | 0.781347197 | 0.557527364 | 0.752347389 | 0.697073983 |
| HEL         | 0.464363711 | 0.785026216 | 0.753173538 | 0.667521155 |
| EOL-1       | 0.486694777 | 1.111548263 | 0.753506411 | 0.783916484 |
| PA-TU-8988T | 0.752800888 | 0.90099429  | 0.753995673 | 0.802596951 |



|                            |             |             |             |             |
|----------------------------|-------------|-------------|-------------|-------------|
| CMK-11-5                   | 0.476242125 | 0.950630979 | 0.755240236 | 0.727371113 |
| TE-15                      | 0.888089251 | 0.664339118 | 0.756628913 | 0.769685761 |
| HCC-44                     | 0.527014587 | 0.734866223 | 0.756934508 | 0.672938439 |
| HCC38                      | 0.965650926 | 0.607237585 | 0.757045942 | 0.776644818 |
| C2BBe1                     | 0.938445686 | 0.990715181 | 0.757257913 | 0.895472927 |
| COR-L95                    | 0.691930138 | 0.69908006  | 0.758079856 | 0.716363351 |
| ACC-MESO-1                 | 0.876988689 | 0.721391508 | 0.758369875 | 0.785583357 |
| NCI-H2029                  | 0.790258635 | 0.578213584 | 0.758580874 | 0.709017698 |
| AMO-1                      | 0.476337938 | 1.078058578 | 0.759994652 | 0.771463723 |
| Panc 02.03                 | 0.621867845 | 0.162883538 | 0.761112775 | 0.515288053 |
| Ishikawa (Heraklio) 02 ER- | 0.766417911 | 0.731003291 | 0.761540046 | 0.752987083 |
| LAMA-84                    | 0.495922547 | 0.867749546 | 0.7617275   | 0.708466531 |
| SNU-216                    | 0.748736577 | 0.503396063 | 0.7623167   | 0.671483113 |
| KO52                       | 0.601707989 | 0.907284592 | 0.762677744 | 0.757223442 |
| BFTC-905                   | 0.816206171 | 0.661560341 | 0.763811105 | 0.747192539 |
| NCI-H2286                  | 0.782429785 | 0.826170681 | 0.764086948 | 0.790895804 |
| HEC-1-B                    | 0.463577244 | 0.87623575  | 0.764244586 | 0.701352526 |
| TE-9                       | 0.956257357 | 0.480994236 | 0.765273479 | 0.734175024 |
| PE/CA-PJ15                 | 0.896056527 | 0.495055201 | 0.765537153 | 0.71888296  |
| JHH-1                      | 0.531050162 | 1.073787132 | 0.765774233 | 0.790203843 |
| LXF-289                    | 0.67254688  | 0.895281056 | 0.76584256  | 0.777890165 |
| Kasumi-6                   | 0.606777026 | 0.811744873 | 0.76588483  | 0.728135576 |
| RT-112                     | 1.091931448 | 0.476590327 | 0.767731452 | 0.778751076 |
| BT-20                      | 0.777623447 | 0.462285866 | 0.767735939 | 0.669215084 |
| YD-38                      | 0.887532071 | 0.585507274 | 0.768580121 | 0.747206489 |
| CAL-29                     | 1.031908895 | 0.498286299 | 0.769019481 | 0.766404892 |
| TE-6                       | 0.773127006 | 0.761838664 | 0.769982525 | 0.768316065 |
| NCI-H660                   | 0.770409469 | 0.635128691 | 0.770688094 | 0.725408751 |
| HT-1376                    | 0.762118283 | 0.634762012 | 0.770705547 | 0.722528614 |
| NUGC-3                     | 0.78114545  | 0.792773175 | 0.771636506 | 0.78185171  |
| TE-5                       | 0.759906878 | 0.602696171 | 0.772722213 | 0.711775087 |
| HCC4006                    | 0.67769073  | 0.34153349  | 0.773054262 | 0.597426161 |
| L-428                      | 0.730038221 | 0.833123649 | 0.773110575 | 0.778757482 |
| KOPN-8                     | 0.504117127 | 0.997015614 | 0.775395879 | 0.758842873 |
| T-47D                      | 0.811269113 | 0.586067676 | 0.775731957 | 0.724356249 |
| SW 900                     | 0.731420222 | 0.935308676 | 0.776564747 | 0.814431215 |
| NCI-H1573                  | 0.794668257 | 0.671380806 | 0.777126549 | 0.747725204 |
| NUGC-4                     | 0.786115925 | 0.74014909  | 0.777413886 | 0.767892967 |
| KYSE-410                   | 0.718418485 | 0.696156071 | 0.778418217 | 0.730997591 |
| NCI-H1869                  | 0.762429275 | 0.060129556 | 0.778991316 | 0.533850049 |
| NCI-H1395                  | 0.850100282 | 0.855551861 | 0.779970736 | 0.82854096  |
| Caov-4                     | 0.877190678 | 0.699514883 | 0.780229028 | 0.785644863 |
| Sq-1                       | 0.619502477 | 0.489809037 | 0.780490676 | 0.629934063 |
| NCI-H2126                  | 0.683651254 | 0.574977783 | 0.780710718 | 0.679779918 |
| CAMA-1                     | 0.80193816  | 0.626522263 | 0.781711229 | 0.736723884 |
| CADO-ES1                   | 0.727042245 | 1.011690325 | 0.782658992 | 0.840463854 |
| SU-DHL-1                   | 0.393535393 | 1.332478731 | 0.783081218 | 0.836365114 |

|                       |             |             |             |             |
|-----------------------|-------------|-------------|-------------|-------------|
| <b>T.T</b>            | 0.788948844 | 0.67173681  | 0.784049    | 0.748244885 |
| <b>HT-29</b>          | 0.870086553 | 0.625567973 | 0.784084106 | 0.759912877 |
| <b>DMS 79</b>         | 0.731282387 | 0.832329153 | 0.784207031 | 0.782606191 |
| <b>MKN74</b>          | 0.692670441 | 0.652705014 | 0.784838342 | 0.710071266 |
| <b>NCI-H2444</b>      | 0.818048452 | 0.911022031 | 0.784922073 | 0.837997519 |
| <b>SW48</b>           | 0.684389175 | 0.826551322 | 0.787453315 | 0.766131271 |
| <b>KYSE-150</b>       | 0.880813967 | 0.484883322 | 0.788166074 | 0.717954454 |
| <b>MDA-MB-453</b>     | 0.973944592 | 0.558749639 | 0.788496789 | 0.77373034  |
| <b>ME-1</b>           | 0.882592737 | 0.841536737 | 0.789717813 | 0.837949096 |
| <b>AML-193</b>        | 0.539111945 | 1.145739056 | 0.790178273 | 0.825009758 |
| <b>EFM-19</b>         | 0.828273552 | 0.307091922 | 0.790632889 | 0.641999455 |
| <b>CFPAC-1</b>        | 0.680779163 | 0.731722869 | 0.791077067 | 0.734526366 |
| <b>VM-CUB1</b>        | 0.887832745 | 0.905542859 | 0.791880367 | 0.86175199  |
| <b>NCI-H209</b>       | 0.83210925  | 0.593243952 | 0.792593004 | 0.739315402 |
| <b>NCI-H1648</b>      | 0.931123402 | 0.631499855 | 0.793061274 | 0.785228177 |
| <b>SU.86.86</b>       | 0.827580273 | 0.810634619 | 0.793852338 | 0.810689077 |
| <b>RL95-2</b>         | 0.985499575 | 0.694002021 | 0.796350461 | 0.825284019 |
| <b>PC-14</b>          | 0.715465839 | 0.379110069 | 0.796944229 | 0.630506712 |
| <b>LOU-NH91</b>       | 0.686679462 | 0.66906158  | 0.79745132  | 0.717730787 |
| <b>CAL-148</b>        | 0.964746246 | 0.568697772 | 0.797984525 | 0.777142848 |
| <b>HCC1599</b>        | 0.92714148  | 0.488761489 | 0.800267958 | 0.738723642 |
| <b>KMS-18</b>         | 0.648186541 | 1.299958765 | 0.800647159 | 0.916264155 |
| <b>AU565</b>          | 0.945761141 | 0.396593951 | 0.802256835 | 0.714870642 |
| <b>KP-2</b>           | 1.19206683  | 0.670468669 | 0.803532711 | 0.888689403 |
| <b>SNU-840</b>        | 0.677898465 | 0.531425967 | 0.804491275 | 0.671271902 |
| <b>A549</b>           | 0.591536106 | 0.433160993 | 0.80499446  | 0.609897187 |
| <b>SW948</b>          | 0.979737154 | 0.905464288 | 0.805256935 | 0.896819459 |
| <b>LS123</b>          | 0.887723753 | 0.717078053 | 0.806571255 | 0.80379102  |
| <b>NCI-H1623</b>      | 0.874207712 | 0.751313244 | 0.806946211 | 0.810822389 |
| <b>MDA-MB-175-VII</b> | 0.793672628 | 0.359494464 | 0.808099055 | 0.653755382 |
| <b>NCI-H2023</b>      | 0.609617168 | 0.73254132  | 0.808300186 | 0.716819558 |
| <b>NCI-H510</b>       | 0.774939277 | 0.782506998 | 0.808417784 | 0.788621353 |
| <b>YMB-1</b>          | 0.904466168 | 0.656345568 | 0.809359529 | 0.790057088 |
| <b>KYSE-510</b>       | 0.815585924 | 0.610418149 | 0.810558162 | 0.745520745 |
| <b>SNU-308</b>        | 0.937125591 | 0.806968127 | 0.81092229  | 0.851672003 |
| <b>NCI-H146</b>       | 0.878689412 | 0.854907182 | 0.811708607 | 0.848435067 |
| <b>NCI-H226</b>       | 0.908940062 | 1.053412391 | 0.81274447  | 0.925032307 |
| <b>Detroit 562</b>    | 0.836801159 | 0.724110152 | 0.812825014 | 0.791245442 |
| <b>NCI-H1836</b>      | 0.849409528 | 0.849521884 | 0.813507645 | 0.837479686 |
| <b>EM-2</b>           | 0.589228285 | 0.909621486 | 0.814169159 | 0.77100631  |
| <b>BxPC-3</b>         | 0.966977076 | 0.719773619 | 0.816154652 | 0.834301782 |
| <b>NCI-H1355</b>      | 0.719681431 | 0.868415006 | 0.81737982  | 0.801825419 |
| <b>GDM-1</b>          | 0.498744021 | 1.10703118  | 0.817521368 | 0.807765523 |
| <b>SNU-175</b>        | 0.872683251 | 0.795901099 | 0.8177857   | 0.828790017 |
| <b>SW480</b>          | 0.614917265 | 0.913814647 | 0.819807868 | 0.782846593 |
| <b>HT-1197</b>        | 0.969128649 | 0.594444535 | 0.821732088 | 0.795101757 |
| <b>BT-483</b>         | 1.006438573 | 0.489973634 | 0.821941281 | 0.772784496 |

|             |             |             |             |             |
|-------------|-------------|-------------|-------------|-------------|
| HEC-6       | 0.726436918 | 0.882268376 | 0.822768231 | 0.810491175 |
| HCC2157     | 0.953892318 | 0.77325628  | 0.823059859 | 0.850069486 |
| NCI-H2196   | 0.851594054 | 0.766761935 | 0.823163149 | 0.813839712 |
| JHOM-2B     | 0.972208227 | 0.746505709 | 0.823886859 | 0.847533599 |
| TE-1        | 0.79991148  | 0.727344262 | 0.823984235 | 0.783746659 |
| MCAS        | 0.891236437 | 0.442028776 | 0.824182155 | 0.719149123 |
| PK-1        | 0.962903368 | 0.692258093 | 0.824245531 | 0.826468998 |
| NCI-H810    | 0.987665586 | 0.620534649 | 0.825069235 | 0.811089823 |
| COR-L23     | 0.990986988 | 0.708551642 | 0.825503553 | 0.841680728 |
| TEN         | 0.530470931 | 0.761883473 | 0.825706084 | 0.706020163 |
| ZR-75-1     | 0.950170475 | 0.652586816 | 0.827287565 | 0.810014952 |
| RMUG-S      | 0.804316716 | 0.731371674 | 0.827390389 | 0.787692926 |
| HT55        | 1.002360971 | 0.809961123 | 0.827632019 | 0.879984704 |
| KE-39       | 0.654765494 | 0.86749147  | 0.829889588 | 0.784048851 |
| HCC70       | 1.018849062 | 0.532343134 | 0.830263802 | 0.793818666 |
| SNU-61      | 0.946068611 | 0.609823922 | 0.831081553 | 0.795658029 |
| HCC-1171    | 0.931881836 | 0.86345124  | 0.831131277 | 0.875488118 |
| DMS 153     | 0.86245035  | 0.837062626 | 0.83128407  | 0.843599016 |
| HCC-56      | 0.904457053 | 0.773100374 | 0.831298217 | 0.836285215 |
| NCI-H1650   | 0.979005981 | 0.617107326 | 0.833616475 | 0.809909927 |
| RERF-LC-KJ  | 0.844433514 | 0.699407427 | 0.834416583 | 0.792752508 |
| NU-DHL-1    | 0.688664194 | 1.084129305 | 0.835868361 | 0.869553953 |
| SNU-1040    | 0.873088106 | 0.771719754 | 0.835885482 | 0.82689778  |
| LS1034      | 0.92846906  | 0.850006797 | 0.838006626 | 0.872160828 |
| HCC1500     | 0.918717129 | 0.723977668 | 0.838223244 | 0.826972681 |
| NCI-H1568   | 0.818216606 | 0.718640089 | 0.838799096 | 0.791885264 |
| TE-10       | 0.857096422 | 0.739811031 | 0.839048116 | 0.81198519  |
| NCI-H441    | 0.699068255 | 0.526871412 | 0.839306487 | 0.688415385 |
| OVCAR-4     | 0.990597979 | 0.630866778 | 0.840377466 | 0.820614074 |
| NCI-N87     | 1.124394323 | 0.75443506  | 0.842846612 | 0.907225332 |
| RT112/84    | 1.151955714 | 0.568485782 | 0.842879441 | 0.854440313 |
| LU65        | 0.428836525 | 1.030730342 | 0.843127848 | 0.767564905 |
| Panc 04.03  | 0.88173361  | 0.962944505 | 0.844204538 | 0.896294218 |
| NCI-H2291   | 0.85343526  | 0.82372287  | 0.844767183 | 0.840641771 |
| RERF-LC-Ad1 | 0.952463174 | 0.915480538 | 0.845103609 | 0.904349107 |
| Panc 05.04  | 0.955455561 | 0.973279034 | 0.845748271 | 0.924827622 |
| NCI-H1435   | 0.7452477   | 0.610178729 | 0.847538542 | 0.734321657 |
| NCI-H727    | 1.066101315 | 0.894496487 | 0.847601355 | 0.936066386 |
| PA-TU-8902  | 0.666156884 | 0.283559663 | 0.84797573  | 0.599230759 |
| CL-14       | 0.950738912 | 0.925429572 | 0.848100063 | 0.908089516 |
| HEC-1-A     | 0.77651761  | 0.661372057 | 0.84829294  | 0.762060869 |
| OVKATE      | 1.07312718  | 0.646077055 | 0.849662892 | 0.856289042 |
| BICR 6      | 0.931411681 | 0.630412539 | 0.850050161 | 0.803958127 |
| HCT-15      | 0.836689317 | 0.860914864 | 0.85114456  | 0.849582914 |
| ChaGo-K-1   | 0.965266725 | 0.704472066 | 0.85185276  | 0.840530517 |
| HuG1-N      | 0.916004904 | 0.949812392 | 0.851982749 | 0.905933348 |
| GP2d        | 1.009584395 | 0.642634197 | 0.852719143 | 0.834979245 |

|                 |             |             |             |             |
|-----------------|-------------|-------------|-------------|-------------|
| HEC-151         | 0.60919232  | 0.976349157 | 0.853172852 | 0.812904776 |
| SNU-407         | 0.796801073 | 0.832924314 | 0.85330627  | 0.827677219 |
| SK-BR-3         | 1.08376509  | 0.520009912 | 0.853726709 | 0.819167237 |
| LNCaP clone FGC | 0.742030227 | 0.848277423 | 0.854130394 | 0.814812682 |
| BEN             | 1.005891101 | 0.65369799  | 0.854320168 | 0.837969753 |
| HCC1954         | 0.906028298 | 0.655592571 | 0.854881849 | 0.805500906 |
| KCI-MOH1        | 0.831909873 | 0.911672615 | 0.854977224 | 0.866186571 |
| NCI-H1437       | 0.821298346 | 0.592910682 | 0.855661588 | 0.756623538 |
| NCI-H358        | 0.746714023 | 1.018835628 | 0.856773016 | 0.874107556 |
| UACC-893        | 1.086932793 | 0.611344846 | 0.858491091 | 0.852256243 |
| KU-19-19        | 0.902020343 | 0.893222267 | 0.859737529 | 0.88499338  |
| MDA-MB-134-VI   | 0.966406861 | 0.847817809 | 0.860227531 | 0.891484067 |
| KYSE-30         | 0.8482159   | 0.763259474 | 0.862036976 | 0.824504117 |
| SNU-899         | 0.953975222 | 0.7540506   | 0.863745915 | 0.857257246 |
| SW403           | 0.928022831 | 0.767967779 | 0.864009554 | 0.853333388 |
| NCI-H2122       | 1.019955382 | 0.882966258 | 0.865699615 | 0.922873752 |
| EFM-192A        | 1.085359264 | 0.55281078  | 0.867169277 | 0.835113107 |
| HCC202          | 1.111676108 | 0.578880195 | 0.867949796 | 0.852835366 |
| LCLC-97TM1      | 1.066928776 | 0.720331586 | 0.8680027   | 0.885087687 |
| AGS             | 0.743935405 | 1.036686624 | 0.870008598 | 0.883543542 |
| YAPC            | 0.866238163 | 0.453723553 | 0.870038419 | 0.730000045 |
| T3M-4           | 0.980788937 | 0.895484976 | 0.874315134 | 0.916863016 |
| DLD-1           | 0.865054033 | 0.893687807 | 0.874578115 | 0.877773318 |
| SNU-C1          | 0.969065935 | 0.820296977 | 0.874660532 | 0.888007815 |
| L3.3            | 0.820033397 | 0.759666338 | 0.875137852 | 0.818279196 |
| Capan-2         | 0.883228926 | 0.999678122 | 0.87674228  | 0.919883109 |
| NCI-H2087       | 0.967081166 | 0.839641026 | 0.877705162 | 0.894809118 |
| HCC-1195        | 0.918166066 | 0.751133419 | 0.879244159 | 0.849514548 |
| SNU-16          | 1.085025471 | 0.64182909  | 0.879783759 | 0.86887944  |
| SW1463          | 0.986242077 | 0.800375712 | 0.88033712  | 0.88898497  |
| JHOS-2          | 0.990238397 | 0.828436068 | 0.884221268 | 0.900965244 |
| SNU-C4          | 0.915069722 | 0.974720688 | 0.885176477 | 0.924988962 |
| COV644          | 1.070168045 | 0.615364237 | 0.885780066 | 0.857104116 |
| NCI-H1693       | 0.804322473 | 1.114095664 | 0.886427479 | 0.934948539 |
| RT4             | 1.226421804 | 0.655493052 | 0.887182894 | 0.923032583 |
| ZR-75-30        | 1.095241798 | 0.578933857 | 0.88779135  | 0.853989002 |
| COLO-680N       | 0.867000144 | 0.65605118  | 0.888656914 | 0.803902746 |
| PK-59           | 0.948421998 | 0.931545906 | 0.888910304 | 0.922959403 |
| DMS 454         | 1.098615064 | 0.668266643 | 0.889579911 | 0.885487206 |
| UACC-812        | 1.173780894 | 0.524466306 | 0.889655813 | 0.862634338 |
| MOR/CPR         | 0.922322374 | 0.560889969 | 0.890849436 | 0.791353927 |
| HCC-15          | 0.757552103 | 0.904608823 | 0.89365196  | 0.851937629 |
| SW 780          | 1.011390374 | 0.820040632 | 0.893990848 | 0.908473952 |
| COR-L105        | 0.896975378 | 0.885380057 | 0.89403081  | 0.892128748 |
| NCI-H322        | 1.089565773 | 0.708457433 | 0.894123519 | 0.897382241 |
| SW620           | 0.975154436 | 0.809644456 | 0.894167659 | 0.89298885  |
| KMBC-2          | 1.027405069 | 0.768069216 | 0.89460994  | 0.896694742 |

|                    |             |             |             |             |
|--------------------|-------------|-------------|-------------|-------------|
| <b>MKN7</b>        | 0.949585487 | 0.699200952 | 0.894992989 | 0.847926476 |
| <b>OE19</b>        | 0.902715874 | 0.947046526 | 0.895183573 | 0.914981991 |
| <b>NCI-H2110</b>   | 0.966262778 | 0.733765705 | 0.897117579 | 0.865715354 |
| <b>CL-34</b>       | 0.986505093 | 0.832469092 | 0.899730016 | 0.906234734 |
| <b>HPAC</b>        | 0.853553254 | 0.7101185   | 0.901806605 | 0.82182612  |
| <b>BT-474</b>      | 1.281182232 | 0.577116674 | 0.901855184 | 0.920051363 |
| <b>MKN-45</b>      | 1.046628739 | 0.698114927 | 0.902843866 | 0.882529177 |
| <b>OAW28</b>       | 1.065320099 | 0.762518408 | 0.904173679 | 0.910670728 |
| <b>SNU-620</b>     | 0.990806978 | 0.80676282  | 0.904975521 | 0.90084844  |
| <b>SNU-478</b>     | 0.963232087 | 0.647849137 | 0.905714656 | 0.83893196  |
| <b>NCI-H508</b>    | 0.972406823 | 0.776333784 | 0.908198841 | 0.885646482 |
| <b>KATO III</b>    | 1.027241308 | 0.341151666 | 0.913425176 | 0.76060605  |
| <b>HUP-T4</b>      | 1.058434837 | 0.829683509 | 0.914035042 | 0.934051129 |
| <b>SNU-1196</b>    | 1.055525    | 0.873514765 | 0.916534006 | 0.94852459  |
| <b>NCI-H2347</b>   | 0.967608574 | 1.016095058 | 0.917612139 | 0.967105257 |
| <b>Calu-3</b>      | 1.043376497 | 0.873610938 | 0.918300765 | 0.945096067 |
| <b>JHOS-4</b>      | 1.063787392 | 0.758261303 | 0.918499544 | 0.91351608  |
| <b>CW-2</b>        | 0.883299415 | 0.923645158 | 0.918878702 | 0.908607758 |
| <b>HCC2218</b>     | 1.114118767 | 0.561228507 | 0.918878814 | 0.864742029 |
| <b>NIH:OVCAR-3</b> | 0.993679162 | 0.796829165 | 0.919408052 | 0.90330546  |
| <b>NCI-H747</b>    | 0.919807616 | 1.012472631 | 0.919738742 | 0.950672996 |
| <b>NCI-H2342</b>   | 1.027434447 | 0.742611108 | 0.920487115 | 0.896844223 |
| <b>LS513</b>       | 1.022006395 | 0.799418594 | 0.921173412 | 0.914199467 |
| <b>SNU-283</b>     | 1.021212889 | 0.817583439 | 0.924320593 | 0.921038974 |
| <b>EBC-1</b>       | 1.023401554 | 1.007905035 | 0.926631843 | 0.985979478 |
| <b>COLO-678</b>    | 0.841941813 | 0.911855102 | 0.927793436 | 0.89386345  |
| <b>NCI-H1838</b>   | 0.86768483  | 0.870483962 | 0.92905934  | 0.889076044 |
| <b>HT115</b>       | 1.077365919 | 0.823364834 | 0.930669791 | 0.943800181 |
| <b>23132/87</b>    | 1.058855152 | 0.887188041 | 0.930708344 | 0.958917179 |
| <b>Capan-1</b>     | 1.062216196 | 0.822238826 | 0.932836838 | 0.939097287 |
| <b>TE-4</b>        | 0.935377778 | 0.814969667 | 0.933186739 | 0.894511395 |
| <b>HEC-265</b>     | 0.94819801  | 0.696878741 | 0.939173394 | 0.861416715 |
| <b>DMS 53</b>      | 1.214675239 | 0.833082657 | 0.941287482 | 0.996348459 |
| <b>HCC1419</b>     | 1.140738486 | 0.682306811 | 0.943332613 | 0.92212597  |
| <b>Panc 08.13</b>  | 0.98661095  | 0.870382123 | 0.944596257 | 0.93386311  |
| <b>OE33</b>        | 1.243972649 | 0.805404951 | 0.944696024 | 0.998024541 |
| <b>Panc 03.27</b>  | 0.979077882 | 0.711269753 | 0.945355019 | 0.878567551 |
| <b>HCC2935</b>     | 1.082139187 | 0.725994542 | 0.945621418 | 0.917918382 |
| <b>TGBC11TKB</b>   | 0.901266951 | 0.846436978 | 0.946381001 | 0.89802831  |
| <b>RERF-LC-Ad2</b> | 1.002285347 | 1.020853735 | 0.948245889 | 0.990461657 |
| <b>HEC-108</b>     | 0.891636864 | 0.879692393 | 0.948483146 | 0.906604134 |
| <b>DV-90</b>       | 0.941288438 | 0.82700018  | 0.950751873 | 0.90634683  |
| <b>COLO 668</b>    | 1.170391866 | 0.846889614 | 0.951923924 | 0.989735135 |
| <b>CL-40</b>       | 1.044954886 | 0.861807677 | 0.952454967 | 0.95307251  |
| <b>647-V</b>       | 1.247845107 | 0.708555295 | 0.956058989 | 0.970819797 |
| <b>PL45</b>        | 0.838640999 | 0.615711724 | 0.956575999 | 0.803642907 |
| <b>CCK-81</b>      | 0.939457177 | 1.084998514 | 0.959001403 | 0.994485698 |

|                    |             |             |             |             |
|--------------------|-------------|-------------|-------------|-------------|
| <b>IM95</b>        | 0.946414149 | 0.822441522 | 0.960329997 | 0.909728556 |
| <b>HEC-251</b>     | 0.984381132 | 1.022263487 | 0.962205992 | 0.98961687  |
| <b>KM12</b>        | 1.13001015  | 1.009605686 | 0.96544395  | 1.035019929 |
| <b>NCI-H2170</b>   | 1.204726231 | 0.727451447 | 0.966542097 | 0.966239925 |
| <b>SNU-324</b>     | 0.766982336 | 0.940549629 | 0.967345139 | 0.891625701 |
| <b>LS 180</b>      | 0.972027644 | 0.951159799 | 0.969787695 | 0.964325046 |
| <b>LS411N</b>      | 1.026580264 | 0.974977309 | 0.971762606 | 0.991106726 |
| <b>SK-CO-1</b>     | 1.179840452 | 0.917785965 | 0.973124138 | 1.023583518 |
| <b>COLO 205</b>    | 1.003377508 | 1.120463755 | 0.98098455  | 1.034941937 |
| <b>HCC-78</b>      | 1.116953408 | 0.787359686 | 0.981379433 | 0.961897509 |
| <b>NCI-H1781</b>   | 1.089370005 | 0.742975649 | 0.98609373  | 0.939479794 |
| <b>NCI-H854</b>    | 1.078337642 | 0.927468381 | 0.987979112 | 0.997928378 |
| <b>GSU</b>         | 1.181874892 | 0.760927608 | 0.98813074  | 0.976977747 |
| <b>OCUM-1</b>      | 1.132714756 | 0.979732163 | 0.990320907 | 1.034255942 |
| <b>DU 145</b>      | 0.975932779 | 1.11451995  | 0.991134176 | 1.027195635 |
| <b>PA-TU-8988S</b> | 0.916872365 | 0.973805828 | 0.992148538 | 0.960942244 |
| <b>JHUEM-1</b>     | 1.047013882 | 1.010889566 | 1.00648641  | 1.021463286 |
| <b>Panc 10.05</b>  | 0.929971071 | 0.672254304 | 1.010749277 | 0.870991551 |
| <b>SNU-213</b>     | 0.933365156 | 1.139638815 | 1.025229275 | 1.032744416 |
| <b>CAL-12T</b>     | 1.14558996  | 0.813700496 | 1.026773663 | 0.995354706 |
| <b>SNU-C5</b>      | 1.061436645 | 0.894118312 | 1.028204131 | 0.994586363 |
| <b>SNU-119</b>     | 1.284752398 | 0.758374838 | 1.029813179 | 1.024313471 |
| <b>ABC-1</b>       | 0.935299311 | 1.197274698 | 1.040778476 | 1.057784162 |
| <b>SNU-245</b>     | 1.250958107 | 0.86075641  | 1.04171874  | 1.051144419 |
| <b>SNU-520</b>     | 1.189091557 | 1.10520664  | 1.06622235  | 1.120173515 |

\_\_\_\_\_

**Supplementary Table 5 Sensitivity Predictions for all CCLE Cell Lines.** Sensitivity predictions for all cell lines in the CCLE, using each of the three learned biomarker signatures. A larger score indicates a resistant cell lines, whereas a smaller score indicates a sensitive cell line.



## **SUPPLEMENTARY MATERIAL AND METHODS**

### **IC<sub>50</sub> determination.**

Predicted statin-resistant (BT-474 and NCI-H2170) and sensitive (SK-MES-1 and SK-MEL-24) cell lines were cultured as above, and seeded in 24-well plates at a concentration of  $0.5 \times 10^5$  cells/mL (500  $\mu$ L per well). The next day, cells were treated with 0.1  $\mu$ M, 0.3  $\mu$ M, 1  $\mu$ M, 3  $\mu$ M, 10  $\mu$ M, 30  $\mu$ M, and 100  $\mu$ M atorvastatin (Sigma). Cells treated with 0.2% DMSO (the concentration of DMSO in the 100  $\mu$ M atorvastatin treatment condition) served as the control. Three days after treatment, the cells were washed with PBS and fixed in 3.7% formaldehyde (F79-1, ThermoFisher Scientific) for 15 minutes. Next, the cells were stained with 0.5% w/v crystal violet (Sigma-Aldrich) for 10 minutes. Excess dye was washed extensively with tap water. The absorbed dye was released with 2% SDS. The supernatants were mixed thoroughly before transfer to a 96-well plate to be read at 560 nm using a Tecan SpectraFluor microplate reader (Tecan US, Durham, NC). IC<sub>50</sub> values were determined by fitting a standard, four-parameter sigmoid curve to the data. All treatments were carried out in triplicate samples and data are representative of three independent experiments.

### **Immunofluorescence microscopy.**

Cultured BT-474, NCI-H2170, SK-MES-1 and SK-MEL-24 cells grown on coverslips in a 12-well plate were fixed with 3.7% formaldehyde (F79-1, ThermoFisher Scientific) for 15 min, and then permeabilized with 0.1% Triton-X-100 (Fisher Scientific, Pittsburgh, PA) made in PBS for 20 min. Next, non-specific proteins were blocked in 3% BSA for 45 min at RT. The cells were incubated with a monoclonal mouse antibody to human E-cadherin (1:500, 13-5700, Invitrogen) in a humidified container overnight at 4°C. After overnight incubation, coverslips were washed three times with 0.5% BSA for 5 minutes each and then were probed with an Alexa Fluor 488 goat anti-mouse IgG (1:200, Fisher Scientific) in the dark for 1 hour at RT. Following one 5-minute wash with 0.5% BSA, nuclei were stained with DAPI (1  $\mu$ g/ml) in PBS for 15 min at RT, washed three times with PBS, and mounted in an aqueous-based mounting medium (gelvatol, recipe

courtesy of U-Pitt Center for Biological Imaging). Images were captured with the 60X oil objective lens on an Olympus BX40 fluorescence microscope (Olympus Optical).

## Computational Models

Mixed Graphical Models [1] (MGM) is a new method to learn the direct associations in a dataset consisting of both categorical and continuous data. MGM characterizes the joint distribution of the categorical and continuous variables under the assumptions of linear Gaussian continuous variables and multinomial categorical variables. To prevent overfitting a sparsity penalty,  $\lambda$ , is employed. In accordance with Sedgewick et al. [2], we utilize separate sparsity penalties for each type, and the MGM method is used without modification from this work.

A common problem with using probabilistic graphical models for biomarker identification in highly structured data, like gene expression, is strong correlations between variables (genes). These correlations result in a *lack of stability* of the biomarkers as small changes in the data can result in changes amongst the selected biomarkers; and *multiplicity* of the predictive signatures, since multiple signatures that each contains highly correlated features, can be equally predictive. To mitigate this problem, we developed the Tree-Guided Recursive Cluster Selection (T-ReCS) procedure [3], which performs feature selection at the cluster level, on clusters that are generated dynamically during the feature selection process. We refer the reader to [3] for full details of the T-ReCS algorithm.

## References

- [1] J.D. Lee, T.J. Hastie, Learning the Structure of Mixed Graphical Models, Journal of computational and graphical statistics : a joint publication of American Statistical Association, Institute of Mathematical Statistics, Interface Foundation of North America, 24 (2015) 230-253.
- [2] A.J. Sedgewick, I. Shi, R.M. Donovan, P.V. Benos, Learning mixed graphical models with separate sparsity parameters and stability-based model selection, BMC bioinformatics, 17 Suppl 5 (2016) 175.
- [3] G.T. Huang, I. Tsamardinos, V. Raghun, N. Kaminski, P.V. Benos, T-ReCS: stable selection of dynamically formed groups of features with application to prediction of clinical outcomes, Pac Symp Biocomput, (2015) 431-442.

## **SUPPLEMENTARY RESULTS**

### **Selection of statin sensitive tumors from TCGA-deposited breast cancer samples**

The experimentally confirmed gene expression signatures allow the selection of those subsets of primary tumors or metastases that may be sensitive to statin treatment. To this end, we have applied the biomarker search for transcriptome profiles obtained from breast cancer samples that are deposited in the Cancer Genome Atlas (TCGA) (1). We find that a small subset of primary breast tumors is predicted to be sensitive to statins while many of them are not (Fig. 3). We find no significant correlation with tumor stage, age, race, presence or absence of metastasis ( $p=0.590$ ,  $p=.101$ ,  $p=.290$ ,  $p=.275$ , respectively). Subsequently, we have repeated the procedure for all tumor types in TCGA, finding overall similar trends (Supplementary Fig 3A-3H). We do find a statistically significant correlation to age in Ovarian cancer ( $p<.01$ ) and Leukemia ( $p<.05$ ), as well as an association to tumor progression in a renal cancer cohort ( $p<.001$ ); however, these may be an artifact of multiple hypothesis testing. Note, however, that statin sensitivity does correlate with epithelial-to-mesenchymal transition (EMT) (2). Thus, those subsets of cells in primary tumors that undergo EMT and are most likely to metastasize can be statin sensitive even if the average transcriptome pattern of the bulk tumor does not indicate this.

### **Gene Ontology Enrichment Analysis**

To validate the biological significance of the predictive biomarkers we performed gene ontology enrichment analyses using DAVID (3). Three gene lists were submitted to the resource, representing the three major gene clusters (consisting of more than two genes) that we identified by the Atorva\_T-ReCS approach (Table S1-3). We only used the Atorva\_T-ReCS approach for this analysis because unclustered predictive biomarkers tend to have a single representative from each pathway (since expression of genes in the same pathway tend to be correlated or anti-correlated), and thus ontological analysis would be unable to recognize important terms or important pathways. Through T-ReCS clustering, we mitigate this problem by finding multiple co-expressed genes in a single signature (see Materials and Methods).

Several ontological terms related to the submitted gene lists have evidence of association to statins in the literature. The two major ontological terms from cluster one refer to axonal transport of mitochondria and axon cytoplasm. Though there is no evidence for statins directly acting upon axons, their inhibition of the cholesterol synthesis pathway has been shown to delay axonal growth (4). From cluster two, statins have been shown to have biphasic effects on angiogenesis (5), and they have anti-inflammatory properties through their reduction in quantity of circulating C-reactive protein (CRP) (6). Also, though it is not yet clear if statins have a direct effect on SNARE protein binding, we note that statins may affect the release of insulin, in which SNARE proteins also have a role (7). Cluster three depicts two main terms: cell adhesion/migration and extracellular matrix organization. It has been shown that statins affect the adhesion related expression of selectin and VCAM-1 (8), and they further inhibit migration of cell lines, and in fact this may relate to their anti-inflammatory properties (9,10). In addition, statins have been shown to modulate the metabolism of the extracellular matrix to prevent fibrosis by inhibiting connective tissue growth factor (CTGF) production (11). Overall, this demonstrates the relevance of the genes in our predicted signature to the mechanisms underlying the physiological effect of statin.

### **Determination of potential combination statin therapies**

We discuss here the results of Figure 2 for only those molecules that display positive statistically significant correlations (using False Discovery Rate < 0.05). In sum, we identified 27 drug molecules that satisfied this criterion.

The main drugs with highest statistical significance are BRAF inhibitors (Dabrafenib, PLX-4720, SB590885), MEK inhibitors (Refametinib, Selumetinib), Bcl-2/Bcl-x/Mcl-1 inhibitors (TW37), NF- $\kappa$ B inhibitors (piperlongumine) and HSP-90 inhibitors (Elesclomol) (Table 2). In recent studies, simvastatin was shown to have additive or synergistic effects in combination therapy with BRAF-inhibitor, PLX-4720 (12,13) that seem to depend on the mutational status of melanoma cells (13). A MEK inhibitor was also shown to synergize with statin in a *Drosophila* model of lung cancer (14). Thus, other inhibitors of the Ras-Raf-MEK-ERK pathway could also be tested for synergy with statins. Treatment with mitogen-activated

protein kinase (MAPK) pathway targeted therapies (i.e., combined BRAF and MEK inhibitors) is the current standard of care for patients with BRAF-mutant advanced melanoma demonstrating the clinical relevance of MEK-inhibitors. However, response to these therapies in patients typically lasts less than a year, suggesting that further research is necessary for the better clinical management of these patients (15).

HSP-90 family members can both suppress or contribute to tumor invasiveness. Also, cell surface HSP-90 contributes to metastasis formation (16), while the mitochondrial HSP-90, TRAP-1 suppresses tumor cell invasiveness and plays a role mediating the switch from OxPhos to aerobic glycolysis (17). Indeed, recent studies have also demonstrated that simvastatin synergizes with the HSP-90 inhibitors, 17-DMAG (13) or 17-AAG (12) in inhibiting melanoma cell proliferation.

Although they have not yet been tested in combination with statins the other main identified mechanisms are also of potential interest for statin co-therapy. Bcl-2 and Bcl-xL can promote cell migration, invasion and metastasis perhaps by their promotion of mitochondrial ROS formation (18); In contrast, pro-apoptotic Bcl-2 family members, Bax and Bak attenuate cell migration and metastasis formation (18). The selective Bcl-2 inhibitor ABT199/ Venetoclax is FDA approved and used for treating relapsed/ refractory CLL with 17p deletion. Similarly, the essential role of NF- $\kappa$ B in epithelial-mesenchymal transition (EMT), the main initial event in metastasis development, is well recognized (19,20), and its inhibitors can delay breast cancer invasiveness (21). These data argue that if they are expressed to a sufficient degree in a given cell line, the inhibition of both Bcl-2 and/ or NF- $\kappa$ B may synergize with the tumor growth-inhibitory function of statins.

## References

1. Weinstein, J. N., Collisson, E. A., Mills, G. B., Shaw, K. R., Ozenberger, B. A., Ellrott, K., Shmulevich, I., Sander, C., and Stuart, J. M. (2013) The Cancer Genome Atlas Pan-Cancer analysis project. *Nature genetics* **45**, 1113-1120
2. Warita, K., Warita, T., Beckwitt, C. H., Schurdak, M. E., Vazquez, A., Wells, A., and Oltvai, Z. N. (2014) Statin-induced mevalonate pathway inhibition attenuates the growth of mesenchymal-like cancer cells that lack functional E-cadherin mediated cell cohesion. *Sci Rep* **4**, 7593
3. Huang da, W., Sherman, B. T., and Lempicki, R. A. (2009) Systematic and integrative analysis of large gene lists using DAVID bioinformatics resources. *Nat Protoc* **4**, 44-57
4. Posse De Chaves, E. I., Vance, D. E., Campenot, R. B., Kiss, R. S., and Vance, J. E. (2000) Uptake of lipoproteins for axonal growth of sympathetic neurons. *J Biol Chem* **275**, 19883-19890
5. Sata, M. (2002) Biphasic effects of statins on angiogenesis. *Circulation* **106**, e47; author reply e47
6. Antonopoulos, A. S., Margaritis, M., Lee, R., Channon, K., and Antoniades, C. (2012) Statins as anti-inflammatory agents in atherogenesis: molecular mechanisms and lessons from the recent clinical trials. *Curr Pharm Des* **18**, 1519-1530
7. Abbas, A., Milles, J., and Ramachandran, S. (2012) Rosuvastatin and atorvastatin: comparative effects on glucose metabolism in non-diabetic patients with dyslipidaemia. *Clin Med Insights Endocrinol Diabetes* **5**, 13-30
8. Dimitrova, Y., Dunoyer-Geindre, S., Reber, G., Mach, F., Kruithof, E. K., and de Moerloose, P. (2003) Effects of statins on adhesion molecule expression in endothelial cells. *J Thromb Haemost* **1**, 2290-2299
9. Wong, B., Lumma, W. C., Smith, A. M., Sisko, J. T., Wright, S. D., and Cai, T. Q. (2001) Statins suppress THP-1 cell migration and secretion of matrix metalloproteinase 9 by inhibiting geranylgeranylation. *J Leukoc Biol* **69**, 959-962
10. Maher, B. M., Dhonnchu, T. N., Burke, J. P., Soo, A., Wood, A. E., and Watson, R. W. (2009) Statins alter neutrophil migration by modulating cellular Rho activity--a potential mechanism for statin-mediated pleiotropic effects? *J Leukoc Biol* **85**, 186-193
11. Jarvelainen, H., Sainio, A., Koulu, M., Wight, T. N., and Penttinen, R. (2009) Extracellular matrix molecules: potential targets in pharmacotherapy. *Pharmacol Rev* **61**, 198-223
12. Gayvert, K. M., Aly, O., Platt, J., Bosenberg, M. W., Stern, D. F., and Elemento, O. (2017) A Computational Approach for Identifying Synergistic Drug Combinations. *PLoS computational biology* **13**, e1005308
13. Held, M. A., Langdon, C. G., Platt, J. T., Graham-Steed, T., Liu, Z., Chakraborty, A., Bacchiocchi, A., Koo, A., Haskins, J. W., Bosenberg, M. W., and Stern, D. F. (2013) Genotype-selective combination therapies for melanoma identified by high-throughput drug screening. *Cancer Discov* **3**, 52-67
14. Levine, B. D., and Cagan, R. L. (2016) Drosophila Lung Cancer Models Identify Trametinib plus Statin as Candidate Therapeutic. *Cell reports* **14**, 1477-1487
15. Eroglu, Z., and Ribas, A. (2016) Combination therapy with BRAF and MEK inhibitors for melanoma: latest evidence and place in therapy. *Ther Adv Med Oncol* **8**, 48-56
16. Koga, F., Kihara, K., and Neckers, L. (2009) Inhibition of cancer invasion and metastasis by targeting the molecular chaperone heat-shock protein 90. *Anticancer research* **29**, 797-807
17. Yoshida, S., Tsutsumi, S., Muhlebach, G., Sourbier, C., Lee, M. J., Lee, S., Vartholomaiou, E., Tatokoro, M., Beebe, K., Miyajima, N., Mohny, R. P., Chen, Y., Hasumi, H., Xu, W., Fukushima, H., Nakamura, K., Koga, F., Kihara, K., Trepel, J., Picard, D., and Neckers, L. (2013) Molecular chaperone

TRAP1 regulates a metabolic switch between mitochondrial respiration and aerobic glycolysis. *Proceedings of the National Academy of Sciences of the United States of America* **110**, E1604-1612

18. Um, H. D. (2016) Bcl-2 family proteins as regulators of cancer cell invasion and metastasis: a review focusing on mitochondrial respiration and reactive oxygen species. *Oncotarget* **7**, 5193-5203
19. Helbig, G., Christopherson, K. W., 2nd, Bhat-Nakshatri, P., Kumar, S., Kishimoto, H., Miller, K. D., Broxmeyer, H. E., and Nakshatri, H. (2003) NF-kappaB promotes breast cancer cell migration and metastasis by inducing the expression of the chemokine receptor CXCR4. *The Journal of biological chemistry* **278**, 21631-21638
20. Huber, M. A., Azoitei, N., Baumann, B., Grunert, S., Sommer, A., Pehamberger, H., Kraut, N., Beug, H., and Wirth, T. (2004) NF-kappaB is essential for epithelial-mesenchymal transition and metastasis in a model of breast cancer progression. *The Journal of clinical investigation* **114**, 569-581
21. Ukaji, T., Lin, Y., Okada, S., and Umezawa, K. (2017) Inhibition of MMP-2-mediated cellular invasion by NF-kappaB inhibitor DHMEQ in 3D culture of breast carcinoma MDA-MB-231 cells: A model for early phase of metastasis. *Biochemical and biophysical research communications* **485**, 76-81
